1 **Worldwide population structure, long term demography, and local adaptation of *Helicobacter***  
2 ***pylori***

3

4 Valeria Montano<sup>§1</sup>, Xavier Didelot<sup>‡</sup>, Matthieu Foll<sup>\*‡‡</sup>, Bodo Linz<sup>□\*\*</sup>, Richard Reinhardt<sup>§§□□</sup>, Sebastian  
5 Suerbaum<sup>§§§</sup>, Yoshan Moodley<sup>§\*\*#</sup> and Jeffrey D. Jensen<sup>\*‡‡#</sup>

6

7

8 <sup>§</sup> Konrad Lorenz Institute for Ethology, Department of Integrative Biology and Evolution, University of  
9 Veterinary Medicine Vienna, Austria

10 <sup>1</sup> Department of Ecology and Evolution, University of Lausanne, Lausanne, Switzerland

11 <sup>\*</sup> School of Life Sciences, Ecole Polytechnique Fédérale de Lausanne (EPFL), Lausanne, Switzerland

12 <sup>‡</sup> Department of Infectious Disease Epidemiology, Imperial College London, London W2 1PG, United  
13 Kingdom

14 <sup>□</sup> Department of Biochemistry and Molecular Biology, Pennsylvania State University, University Park,  
15 Pennsylvania, United States of America

16 <sup>§§</sup> Max Planck Genome centre Cologne, D-50829 Cologne, Germany

17 <sup>\*\*</sup> Max Planck Institute for Infection Biology, Department of Molecular Biology, Berlin, Germany

18 <sup>‡‡</sup> Swiss Institute of Bioinformatics (SIB), Lausanne, Switzerland

19 <sup>□□</sup> Max Planck Institute for Molecular Genetics, D-14195 Berlin, Germany

20 <sup>§§§</sup> Hannover Medical School, Institute of Medical Microbiology and Hospital Epidemiology, Hannover,  
21 Germany.

22

23 Data access: NCBI BioProject ID PRJNA245115

1

1

24 Running title: Adaptation in *Helicobacter pylori* whole genome

25 Keywords: Adaptation, neutral evolution, human pathogens

26 # co-corresponding authors

27 Jeffrey D Jensen

28 T: +41 21 69 39616

29 F: +41 21 69 38358

30 Postal address: EPFL SV IBI-SV UPJENSEN

31 AAB 0 48 (Bâtiment AAB)

32 Station 15

33 CH-1015 Lausanne

34 Switzerland

35 email: [jeffrey.jensen@epfl.ch](mailto:jeffrey.jensen@epfl.ch)

36 Yoshan Moodley:

37 T +43 (1) 25077 7335

38 F +43 (1) 489 09 15 801

39 Postal adress:

40 Konrad-Lorenz-Institute of Ethology

41 Department of Integrative Biology and Evolution

42 University of Veterinarian Medicine Vienna

43 Savoyenstr. 1a

44 A-1160 Vienna

45 email: [yoshan.moodley@vetmeduni.ac.at](mailto:yoshan.moodley@vetmeduni.ac.at)

47 **Abstract**

48 *Helicobacter pylori* is an important human pathogen associated with serious gastric diseases. Owing to  
49 its medical importance and close relationship with its human host, understanding genomic patterns of  
50 global and local adaptation in *H. pylori* may be of particular significance for both clinical and  
51 evolutionary studies. Here we present the first such whole-genome analysis of 60 globally distributed  
52 strains, from which we inferred worldwide population structure and demographic history and shed light  
53 on interesting global and local events of positive selection, with particular emphasis on the evolution of  
54 San-associated lineages. Our results indicate a more ancient origin for the association of humans and  
55 *H. pylori* than previously thought. We identify several important perspectives for future clinical  
56 research on candidate selected regions that include both previously characterized genes (*e.g.*  
57 transcription elongation factor *NusA* and tumor Necrosis Factor Alpha-Inducing Protein *Tipα*) and  
58 hitherto unknown functional genes.

## 59 **Introduction**

60 *Helicobacter pylori* is a Gram-negative bacterium that infects the mucosa of the human  
61 stomach. It was first described in the 1980s, when it was initially identified in association with chronic  
62 gastritis and later causally linked to serious gastric pathologies such as gastric cancer and ulcers  
63 (Marshall and Warren 1984; Suerbaum and Michetti 2002). It infects more than 80% of humans in  
64 developing countries and, although its prevalence is lower in developed countries, nearly 50% of the  
65 worldwide human population is infected (Ghose et al. 2005; Salih 2009; Salama et al. 2013).

66 Due to its clinical and evolutionary importance, there has been considerable research on  
67 mechanisms of *H. pylori* transmission, as well as on the population genetics and phylogenetic  
68 relationships among global isolates. Thus far, population genetic analyses have mainly focused on  
69 seven housekeeping genes (usually referred to as MLST), with the primary conclusions being that *H.*  
70 *pylori* strains appear highly structured, and their phylogeographic patterns correlate consistently with  
71 that of their human hosts. Given that the *H. pylori* -humans association is at least 100 kya old (Moodley  
72 et al. 2012), the current population structure of *H. pylori* may be regarded as mirroring past human  
73 expansions and migrations (Falush et al. 2003; Linz et al. 2007; Moodley and Linz 2009; Breurec et al.  
74 2011) and thus help us shed light on yet unknown dynamics of local demographic processes in human  
75 evolution. However, despite the knowledge gained thus far, the long-term global demographic history  
76 of *H. pylori* has never been directly inferred.

77 The long, intimate association of *H. pylori* with humans suggests a history of bacterial  
78 adaptation. Considerable attention has focused on specific genes involved in modulating adaptive  
79 immunity of the host (for a review see Yamaoka 2010 and Salama et al. 2013) and on genomic changes  
80 occurring during acute and chronic *H. pylori* infection (Kennemann et al. 2011; Linz et al. 2014) as  
81 well as during *H. pylori* transmission between human hosts (Linz et al. 2013). However, bacterial  
82 genome adaptation has not been investigated at the global level. Owing to the recent introduction of  
83 next generation sequencing approaches, several complete *H. pylori* genomes have been characterized

84 and are now available to further explore the selective history that might have contributed to shaping the  
85 bacterial genome.

86 Here, we study a combined sample of 60 complete *H. pylori* genome sequences (53 previously  
87 published, 7 newly sequenced) with origins spanning all five continents. Our aims were to detect  
88 adaptive traits that are commonly shared among the worldwide *H. pylori* population as well as to  
89 uncover patterns of local adaptation. We expect that, apart from a generally important role of adaptation  
90 to the human gastrointestinal environment, the differing eco-physiological conditions found in the  
91 gastric niche of worldwide human hosts, based on diverse diets and different bacterial compositions,  
92 could likely generate differential selective pressure on specific bacterial traits leading to locally  
93 adaptive events. For instance, an increase in pathogenicity seems to have occurred in *H. pylori* during  
94 the colonization of East Asia and could be partially explained by the presence of different alleles of  
95 virulence factors (*e.g.* CagA, VacA and OipA; Yamaoka 2010); also, colonization of the stomach niche  
96 has been optimized by regulation of motility and by bacterial cell shape (Sycuro et al. 2012).

97 To disentangle the signatures of demographic processes from the effects of natural selection on  
98 the distribution of allele frequencies, we first investigated the demographic history of our worldwide  
99 genome sample. Given that the genetic structure retrieved among the bacterial genomes mirrors the  
100 geographic distribution of human populations (Moodley and Linz 2009; Breurec et al. 2011; Moodley  
101 et al. 2012), the vast literature on human demographic history provides a solid basis for the study (*e.g.*,  
102 Cavalli-Sforza et al. 1994), but modelling human-*H. pylori* co-evolution would also require knowledge  
103 of transmission dynamics and within-host variation. Despite the large number of surveys carried out,  
104 *H. pylori* transmission via an external source has never been demonstrated and direct contact among  
105 individuals is still considered the predominant mechanism (Brown 2000; Van Duynhoven and De Jonge  
106 2001; Allaker et al. 2002; Perry et al. 2006). Transmission also depends on the hosts' access to health  
107 care and socio-economic conditions. In developing countries, *H. pylori* transmission seems to happen  
108 preferentially but not exclusively among individuals who are closely related or living together

109 (Schwarz et al. 2008; Didelot et al. 2013). However, in developed countries, improved hygienic  
110 conditions have decreased *H. pylori* prevalence, and transmission occurs primarily between family  
111 members, especially from mothers to children (Bureš et al. 2006; Chen et al. 2007; Khalifa et al. 2010;  
112 Krebes et al. 2014). Further, an important epidemiological factor is that a human host is normally  
113 infected with *H. pylori* within the first five years of life and, unless treated, infection persists the entire  
114 host lifespan. The host individual is therefore always potentially infective.

115         The human stomach is typically infected with a single dominant strain, with multiple infections  
116 occurring less frequently (e.g. Schwarz et al. 2008; Morelli et al. 2010; Nell et al. 2013). However, this  
117 empirical observation may be due to an experimental approach that intrinsically limits the detection of  
118 multiple infections (Didelot et al. 2013) since only a single isolate per patient is generally studied, and  
119 more focused approaches have highlighted higher within host variation (Ghose et al. 2005; Patra et al.  
120 2012). In addition, MLST studies have detected a small fraction of human hosts from the same  
121 population sharing the same bacterial strain (or at least highly related strains with identical sequence  
122 type) (Patra et al. 2012; Nell et al. 2013). At the molecular level, mutation and recombination have  
123 been identified as the key forces responsible for population genetic variability (Suerbaum and  
124 Josenhans 2007). A recent whole genome study on 45 infected South Africans demonstrated that  
125 recombination is the major driver of diversification in most (but not all) hosts (Didelot et al. 2013),  
126 confirming previous observations (Falush et al. 2001; Kennemann et al. 2011). At the population level,  
127 recombination is very frequent throughout the genome along with other events such as rearrangements,  
128 transpositions, insertions and gene gain or loss (Gressmann et al. 2005; Kawai et al. 2011). The relative  
129 roles of demographic and selective processes in shaping the bacterial genetic variation during the  
130 lifespan of a single host have yet to be explored.

131         Given our limited knowledge of *H. pylori* epidemiology and thus its consequences on long-term  
132 evolution, we here explore the species' genetic structure using newly available worldwide genomic data  
133 to infer the demographic history of the sampled populations, directly addressing the extent to which the

134 population history of *H. pylori* mirrors that of its human host. Using this estimated demographic model  
135 as a null, we explore two different approaches in order to characterize both local and global events of  
136 positive selection. Our results indicate global signatures of selection in functionally and medically  
137 relevant genes and highlight strong selective pressures differentiating African and non-African  
138 populations, with over one hundred putatively positively selected genes identified.

## 139 **Materials and Methods**

### 140 *Samples and whole genome sequencing*

141           Seven complete *H. pylori* genomes were newly typed for the present study to increase the  
142 currently available set of 53 genomes, in order to represent all five continents (Table S1). The most  
143 valuable contributions among our sequences were the Australian aboriginal, Papua New Guinean  
144 Highlander, Sudanese Nilo-Saharan and South African San genomes, which have never been  
145 previously characterized.

146           Data production was performed on a ROCHE 454 FLX Titanium sequencer. WGS sequencing  
147 libraries for pyrosequencing were constructed according to the manufacturers' protocols (Roche 2009  
148 version). Single-end reads from 454 libraries were filtered for duplicates (gsMapper v2.3, Roche) and  
149 could be directly converted to frg format that was used in the genome assembler by Celera Assembler  
150 v6.1 (CA6.1; Miller et al. 2008). Several software solutions for WGS assembly were tested during the  
151 project among them Roche's Newbler and CeleraAssembler (both can assemble all read types).  
152 Genome assembly was performed on a Linux server with several TB disk space, 48 CPU cores and 512  
153 GB RAM.

154

### 155 *Bioinformatics*

156           After long read assembly, the seven new genomes were further re-ordered using the algorithm  
157 for moving contigs implemented in Mauve 2.3.1 software for bacterial genome alignment (Darling et  
158 al. 2004; 2010). In this analysis, the scaffold sequence for each genome to be reconstructed was  
159 assigned on the basis of geographical proximity. In particular, the sequences from Papua New Guinea  
160 and Australia were re-ordered against an Indian reference (*Helicobacter pylori* India7, GenBank  
161 reference: CP002331.1; see Table S1), given the absence of closer individuals. The global alignment of  
162 the genomes was carried out using mauveAligner in Mauve 2.3.1 with seed size calibrated to ~12 for  
163 our data set (average size ~1.62 megabases). The minimum weight for local collinear blocks, deduced



164 after trial runs performed using default parameter settings, was set to 100. The original Mauve  
165 alignment algorithm was preferred to the alternative progressive approach (progressiveMauve; Darling  
166 et al. 2010) because of its higher performance among closely related bacterial genomes (appropriate in  
167 the present case of intraspecific analysis), its higher computational speed, and to avoid the circularity of  
168 estimating a guide phylogenetic tree to infer the alignment. The aligned sequences shared by all  
169 genomes were uploaded into R using the package *ape* (Paradis et al. 2004) and processed for post  
170 alignment refinement. The length of the genomes prior to alignment ranged from 1,510,564 bp to  
171 1,709,911 bp with an average of 1,623,888 bp. The Mauve alignment consisted of 71 blocks commonly  
172 shared by all the individuals for a total of 2,586,916 sites. Loci with more than 5% missing data were  
173 removed, giving a final alignment of length to 1,271,723 sites. The final number of segregating sites in  
174 the global sample was 342,574 (26.9%). Among these, we found 302,278 biallelic sites and 35,003 and  
175 5,293 tri- and tetra- allelic sites respectively. The distribution of segregating sites along the aligned  
176 sequences is shown in Figure S1.

177

### 178 *Structure analysis*

179 In order to first define the populations to be used in subsequent analyses, we compared a  
180 multivariate approach, discriminant analysis of principal components (DAPC; Jombart et al. 2010) with  
181 two Bayesian analyses of population structure BAPSv5.4 (Corander et al. 2006, 2008) and STRUCTURE  
182 (Pritchard et al. 2000). The first method assesses the best number of clusters optimizing the between-  
183 and within-group variance of allele frequencies and does not assume an explicit biological model,  
184 while the second is based on a biological model that can also detect admixture among individuals. The  
185 optimal number of population clusters was established by both methods. In DAPC this is done through  
186 the Bayesian information criterion (BIC) using the *find.clusters* function in *adegenet* 3.1.9 (Jombart  
187 2008; Jombart and Ahmed 2011) while BAPS estimates the best *K* comparing the likelihood of each  
188 given structure. We ran the DAPC analysis with 1,000 starting points and 1,000,000 iterations and

189 found that results were consistently convergent over 10 independent trials. BAPS was run with a subset  
190 of 100,000 SNPs using the admixture model for haploid individuals and was shown to be effective to  
191 detect bacterial populations and gene flow in large-scale datasets (Tang et al. 2009; Willems et al.  
192 2012). STRUCTURE was run on a subset of 100 kb, for a total of 29,242 SNPs, using 10,000 burn-in  
193 and 50,000 iterations, and we replicated 5 runs for each tested number of partitions (from 2 to 10) with  
194 the admixture model. Finally, the seven housekeeping genes historically used in *H. pylori* population  
195 genetics (MLST) were extracted from the alignment and used to assign populations to strains with  
196 STRUCTUREv2.3.4 (Falush et al. 2007) as a comparison with previous work.

197 For further insight into population structure we reconstructed the clonal genealogy of bacterial  
198 genomes using ClonalFrame v1.2 (Didelot and Falush 2007). This method reconstructs the most likely  
199 clonal genealogy among the sequences under a coalescent model with mutation and recombination, so  
200 that the model of molecular evolution takes into account both the effect of mutated sites and imported  
201 (recombining) sites. We also evaluated fine-scale population structure from sequence co-ancestry using  
202 fineSTRUCTURE (Lawson et al. 2012). This method performs Bayesian clustering on dense  
203 sequencing data and produces a matrix of the individual co-ancestry. Each individual is assumed to  
204 “copy” its genetic material from all other individuals in the sample, and the matrix of co-ancestry  
205 represents how much each individual copied from all others.

206 Population summary statistics (the number of segregating sites, genetic diversity, mean number  
207 of pairwise differences, Tajima's  $D$ , and pairwise  $F_{ST}$ ) were estimated with R packages adegenet and  
208 pegas (Paradis 2010).

209

### 210 *Inferring demographic history*

211 The genomic landscape is shaped by the combined evolutionary signature of population  
212 demography and selection. Not accounting for population demography, therefore, could lead to biased  
213 estimates of both the frequency and strength of genomic selection (e.g., Thornton and Jensen 2007).

214 While many of the available statistical methods for detecting patterns of genome-wide selection have  
215 been argued to be robust to demographic models of population divergence and expansion (Nielsen et al.  
216 2005; Jensen et al. 2007b; Foll and Gaggiotti 2008; Narum and Hess 2011), they also have limitations  
217 (Narum and Hess 2011; Crisci et al. 2013). In highly recombining species such as *H. pylori* (Morelli et  
218 al. 2010; Didelot et al. 2013), evidence of recent positive selection events across the global population  
219 may have become obscured, owing to the reduced footprint of selection.

220 It was therefore necessary to first explicitly infer the demographic history, in order to  
221 disentangle the effects of population demography on the allele frequency distribution from the possible  
222 effects of selective processes. Here, we tested different neutral demographic scenarios, making  
223 assumptions based on the observed genetic structure and previous knowledge of human evolutionary  
224 history.

225 Demographic scenarios were modelled and implemented in the software *fastsimcoal2.1*  
226 (Excoffier et al. 2013), allowing for the estimation of demographic parameters based on the joint site  
227 frequency spectrum of multiple populations. The software calculates the maximum likelihood of a set  
228 of demographic parameters given the probability of observing a certain site frequency spectrum derived  
229 under a specified demographic model. This program uses non-binding initial search ranges that allow  
230 the most likely parameter estimates to grow up to 30%, even outside the given initial search range, after  
231 each cycle. This feature reduces the dependence of the best parameter estimates on the assumed initial  
232 parameter ranges. Model details and initial parameter range distributions are given in Supplementary  
233 Materials (see Files S1 and S2). We assumed a finite site mutation model, meaning that the observed  
234 and simulated joint site frequency spectra were calculated to include all derived alleles in multiple hit  
235 loci (Figure S6).

236

### 237 *Model choice and demographic estimates*

238 Firstly, different tree topologies based on hierarchical structures, as obtained with the

239 approaches described above, were compared to infer the best population tree, assuming divergence  
240 without migration. Once the tree topology with the strongest statistical support was established, we  
241 evaluated and compared the likelihood of models including asymmetric migration among populations.  
242 Migration models were tested starting with interchanging individuals only among single pairs of  
243 closely related populations. We could therefore assess whether adding migration would improve the  
244 likelihood compared to a divergence-without-migration model, and which pairs of populations are most  
245 likely to exchange migrants. We also allowed migration among more distantly related populations in  
246 addition to a simple pairwise stepping stone model.

247         The best model among those tested was selected through the corrected Akaike Information  
248 criterion (AICc) based on the maximum likelihoods calculated for independent runs.

249

#### 250 *Testing models of positive selection*

251         Two different statistical tests were used to detect global and local candidate loci for selection.  
252 First we used the SweeD algorithm (Pavlidis et al. 2013), derived from SweepFinder (Nielsen et al.  
253 2005) to localize recent events of positive selection, an approach based upon comparison with the  
254 ‘background’ site frequency spectrum (Figure S7). The scan for positive selection is carried out by  
255 centering the maximized probability of a selective sweep on a sliding-window locus along the  
256 chromosome, and calculating the composite likelihood for each centered locus to fall within a region  
257 where the distribution of SNPs deviates from the neutral expectation. When an outgroup sequence is  
258 available to establish derived mutations, the empirical site frequency spectrum estimated from the  
259 observed dataset is unfolded, otherwise only minor alleles are used for the calculation (*i.e.*, a folded  
260 SFS). Given the difficulties associated with bacterial genome alignment of suitably close outgroup  
261 species, we ran our estimates on a folded SFS. All tri- and tetra-allelic SNPs were removed, and  
262 monomorphic loci were not considered in the calculation and the grid was set to 500,000 bp. We  
263 analyzed the entire dataset (60 genomes) as well as each of the five populations separately.

264 Second, we applied a method based on the detection of patterns of linkage disequilibrium (LD)  
265 around a SNP (OmegaPlus; Kim and Nielsen 2004; Jensen et al. 2007a; Alachiotis et al. 2012), since  
266 LD is expected to result from a selective sweep owing to the hitchhiking of linked neutral mutations  
267 (Maynard Smith and Haigh 1974). This complements the SFS approach as it is applicable to sub-  
268 genomic regions, contrary to SweeD, and it has proven effective under specific demographic models  
269 for which SFS-based approaches are less powerful (Jensen et al. 2007a; Crisci et al. 2013). We used  
270 windows of size between 1,000 and 100,000 base pairs.

271 Finally, a total of 1000 simulated data sets, generated using most likely demographic parameter  
272 estimates, were analyzed with SweeD and OmegaPlus in order to gain an empirical distribution of  
273 likelihoods (SweeD) and omega values (OmegaPlus) in a neutrally evolving population. The only  
274 parameter drawn from a range was the recombination rate, calibrated around the most likely estimate  
275 obtained with ClonalFrame, with the aim of providing an empirical evaluation of its impact on the  
276 methods we used to infer selection. The simulated distribution of these selection statistics, based upon  
277 the previously inferred demographic history, allows for statistical statements to be made regarding the  
278 likelihood that observed outliers are consistent with neutrality alone. A  $p$ -value for each observed  
279 omega and likelihood was obtained using the function *as.randtest* of *ade4* R package, calculated as  
280  $(\text{number of simulated values equal to or greater than the observed one} + 1) / (\text{number of simulated values}$   
281  $+ 1)$ .

282

### 283 *Gene annotation and biological interpretation of the results*

284 Annotation of the bacterial genes was performed using the free automated web server *BASys*  
285 (Bacterial Annotation System, [www.basys.ca](http://www.basys.ca); Van Domselaar et al. 2005). The annotation was run on  
286 aligned sequences, removing multiply hit loci. The annotated genome of Africa1 is provided as an  
287 example in Supplementary File 3, and all annotation files are available upon request. The regions  
288 identified as being under selection were then compared with the gene annotation.

## 289 **Results**

### 290 *Population structure and genetic diversity*

291         Given the difficulties of defining a population among a bacterial sample, we decided to perform  
292 our cluster analysis using three approaches (DAPC, BAPS and STRUCTURE) that rely on very  
293 different assumptions, keeping in mind that using semi or fully parametric methods (such as  
294 STRUCTURE-like approaches) is more likely to lead to violation of the methodological assumptions  
295 and therefore to biased results (Lawson 2013). DAPC may out-perform STRUCTURE when dealing  
296 with data sets with a high degree of isolation by distance (e.g. Kalinowsky 2011), as it is likely the case  
297 for *H. pylori* populations (Linz et al. 2007; Moodley and Linz 2009), and it also provides the possibility  
298 of visualizing clusters' reciprocal distances in the multivariate discriminant space. BAPS and  
299 STRUCTURE, on the other hand, offer a biological model to test individual admixture, which is  
300 particularly useful to gain an understanding of the degree of differentiation, such that these  
301 methodologies may be considered complementary. Population structure analyses were consistent  
302 between the model-free DAPC and model-based BAPS and STRUCTURE approaches. All structure  
303 approaches were in agreement on a worldwide number of populations that does not exceed  $K = 4$ .  
304 DAPC indicated  $K = 4$  as the best clustering (Figure S2A) while BAPS estimates  $K = 3$  and  
305 STRUCTURE analysis offers a best  $K$  in between 2 and 4, with most support for  $K = 3$  and partitions  
306 above 5 dramatically decreasing the likelihood (Figure S2B). Most importantly, the three methods are  
307 in consistent agreement on the assignment of single individuals to clusters (Table S1). With the least  
308 hierarchical division ( $K = 3$ ), one population comprised African genomes containing all strains from  
309 Khoisan-speaking human hosts (referred to as Africa2; Figure 1A and Figure S3). Other African and  
310 European strains fell into a population cluster, called here AfricaEu (Figure 1A and Figure S3). A final  
311 population is composed of Central Asian, Sahul, East Asian and Amerind strains (AsiaAmerica; Figure  
312 1A and Figure S3). Finer structuring ( $K = 4$ ) separates the non-Khoisan African sequences (Africa2 and  
313 Africa 1), but merged European with Central Asian sequences into a new population (referred to as

314 EuroAsia), with Asian and American strains making up the fourth cluster (AsiaAmeria). The only  
315 difference between DAPC, BAPS and STRUCTURE analyses at  $K = 4$  is given by individual 7, which  
316 is clustered in the AsiaAmerican or EuroAsian populations, respectively. At  $K > 4$ , American strains  
317 were separated into a fifth independent cluster by DAPC, but not by BAPS or STRUCTURE. Plotting  
318 the first two discriminant components (DCs) for  $K = 4$  (Figures 1B) most strikingly depicted the second  
319 African cluster as highly divergent along DC1, whereas divergence among the other clusters was  
320 mainly along DC2.

321 The clonal genealogy (Figure S4) and analysis of fine structure (Figure S5) were in strong  
322 agreement with the geographical structuring elucidated by previous approaches. The Africa2 population  
323 was well differentiated in the genealogical tree (Figure S4) and in the co-ancestry matrix (Figure S5),  
324 while the remaining populations appear more closely related, and all non-African strains formed a  
325 clearly monophyletic clonal group. Asian and American populations were well differentiated in the co-  
326 ancestry analysis and were divided into distinct sub-clades in the clonal genealogy. The two Sahul  
327 genomes shared a higher degree of relatedness with three Indian genomes and these did not cluster  
328 monophyletically with the other Eurasian genomes in the clonal genealogy, instead clustering  
329 geographically between Eurasian and East Asian groups (see both Figure S4 and S5). Individual 7  
330 appeared intermediately related to both Indian-Sahul and the more divergent Amerind strains. In the  
331 following analyses, this strain was left within the European population as indicated by BAPS and also  
332 by STRUCTURE analyses of the MLST data (hpEurope).

333 The population genomic structure elucidated here is in agreement with previous analyses of  
334 global structuring of MLST genes, where the highest diversity was found among African strains, the  
335 most divergent being the population hpAfrica2 (Falush et al. 2003). They also agree that Central Asian  
336 (hpAsia2), North-East African (hpNEAfrica) and European (hpEurope) strains are closely related (Linz  
337 et al. 2007) and sister to hpSahul (Australians and New Guineans, Moodley et al. 2009), and that East  
338 Asian and Amerind strains (hpEastAsia) share a relatively recent common ancestor (Moodley and Linz

339 2009). The divergent hpAfrica2 was shown to have originated in the San, a group of click-speaking  
340 hunter-gatherers whose extant distribution is restricted to southern Africa (Moodley et al. 2012). A  
341 complete list of individuals, geographic origin and cluster assignment based on DAPC, BAPS and  
342 STRUCTURE (100kb and MLST extracted from our alignment) is given Table S1. Predictably, genetic  
343 diversity indices were highest for the Eurasian population containing the geographically diverse strains  
344 from North East Africa-Europe-Central Asia and Sahul, especially evident from the number of tri-  
345 allelic and tetra-allelic loci and the mean number of pair-wise differences, while the Amerind  
346 population was most homogeneous (Table 1). It is worth noting that within the EuroAsian population  
347 there is the highest nucleotide diversity, as European sequences show a value of 0.042 (s.d. 0.0005), the  
348 three Indian strains 0.038 ( $\pm$  0.0008) and the only two Sahul sequences 0.036 ( $\pm$  0.0013). Only the  
349 Africa1 population reaches such value of internal diversity ( $0.038 \pm 0.0003$ ), while all the others fell  
350 below 0.03.

351

### 352 *Demographic inference*

353 Overall, the different clustering methods and genealogical approaches implemented here were  
354 largely consistent in their population assignment. Although the American cluster appears to be more  
355 likely sub-structure, we included it into the further analyses as a separated population. This is owing to  
356 the fact that the demographic and selective history associated with the peopling of the Americas would  
357 suggest that this group of strains have likely undergone a very different fate than the East Asian strains  
358 with which they are closely related. This notion seems indeed to be confirmed by the population-  
359 specific tests of positive selection presented below. Furthermore, treating American strains separately  
360 offers the possibility of testing the hypothesis of a concerted bacterial-human expansion, as the timing  
361 of human colonization of the Americas is a well-characterized event, allowing for comparison with our  
362 inference. We proceeded hierarchically to test different genealogical topologies building on the  
363 population structure outlined above. First we tested the hypothesis of three main worldwide populations



364 ( $K = 3$ , panel A, Fig. S5), with Africa2 strains forming the most ancestral population, in agreement with  
365 our and previous findings (Moodley et al. 2012). Alternative origins of the two other clusters –  
366 AfricaEu and AsiaAmerica – were therefore tested in three possible topologies (1-3, panel A, Fig. S5),  
367 with these two populations derived after an ancient split with the Africa2 ancestral population (Figure  
368 S6). A comparison of likelihoods suggests the first genealogical setting (see Figure S6) as the most  
369 supported, that is, AfricaEu strains are more ancestral than Eastern Asian and American strains,  
370 following a pattern close to that of human expansion (Table S2A).

371 Introducing a further population subdivision (i.e.,  $K = 4$ ), we tested different hypotheses for the  
372 origin and timing of the out-of-Africa sub-populations, that is EuroAsia and AsiaAmerica (Panel B,  
373 Figure S6). Lastly, we considered an additional sub-population formed by American strains, in  
374 agreement with DAPC subdivision at  $K > 4$  (panel C, Figure S6). Clearly, the addition of multiple  
375 populations decreases the degrees of freedom and likelihood value of demographic models, and the  
376 hierarchical levels A, B and C are thus not directly comparable. However, in all tests, a model of  
377 population split resembling human expansion out-of-Africa was always preferred (Table S2A). The  
378 results of demographic inference for models without migration were highly compatible across different  
379 population sub-structures (Table S2A).

380 Finally, hierarchical models based on five populations, and using the most likely genealogical  
381 topology obtained with a purely divergent model, were also tested under the assumption of  
382 asymmetrical between lineage gene flow. Each time a pairwise asymmetric migration rate improved the  
383 likelihood of the model, the same scenario was re-analysed adding a further pairwise migration rate, for  
384 a total of 20 demographic models tested (divergence plus migration). Pairwise migration rates among  
385 populations improved the likelihood of the divergence model, and the addition of further inter-  
386 population migrations highlighted that the most likely model is an asymmetric full island, although this  
387 model supports very little gene flow among these major worldwide populations (consistently  $\ll 0.001$   
388 of effective population size per generation; Table 2B). The corrected AIC takes into account both

389 number of parameters and number of observations, allowing for a consideration of differences in the  
390 likelihood comparison (Table S2). We ran these demographic inferences with and without redundant  
391 (near-identical) genome sequences from populations Africa2 and Africa1 (30, 31, 48 and 53) in order to  
392 correct for potential sampling bias, and obtained highly similar results.

393 Comparing population parameters estimated with different models indicates that the  
394 introduction of migration primarily influences results concerning the time of population splits and  
395 mutation rate (Table 2). While effective past and current population sizes have different absolute  
396 values, trends of population reduction (African populations) and growth (non-African populations) are  
397 confirmed throughout different models.

398 The timing of the two population splits, T2 and T4 (Figure 2, Table 2A), which presumably  
399 correspond to the out-of-Africa and American colonization events, are comparable to human estimates  
400 of population splits. Indeed, the second event appears to be 2 to 4 times more recent than the first (on  
401 average, ~38k generations versus ~110k generations, respectively), as expected under a bacterial-host  
402 model of co-expansion. According to models without migration, the estimate of divergence in number  
403 of generations of the Africa2 population from the other African strains (T1) also fits the timing of the  
404 divergence of the San population from other Africans, being twice as old as the out-of-Africa  
405 divergence (~249k generations ago; Table 2A). Indeed, previous inferences based on human genetic  
406 data have estimated these events to have happened ~60kya for the out-of-Africa (Eriksson et al. 2012),  
407 ~20kya for the arrival into the Americas (Eriksson et al. 2012), and ~110kya for San divergence  
408 (Veeramah et al. 2011; Hammer et al. 2011; Schlebusch et al. 2012). On the other hand, the time inferred  
409 from the *H. pylori* dataset for the San split under the most likely model, which includes migration, is  
410 older than ~500k generations.

411 The long term mutation rate per site per generation estimated with *fastsimcoal2.1* varies  
412 between  $\sim 8.47 \times 10^{-7}$  and  $\sim 9.73 \times 10^{-4}$  (Table 2), this second estimate being much faster than the  
413 previous long term estimate, per site per year, from Morelli et al. (2010), based on the coalescent tree

414 of the 7 housekeeping genes and inferred with ClonalFrame ( $2.6 \times 10^{-7}$ ). Other previous estimates  
415 based on 78 gene fragments from serial and family isolates ( $1.4\text{-}4.5 \times 10^{-6}$ ; Morelli et al. 2010), upon  
416 genomes sequentially taken from patients with chronic infection ( $2.5 \times 10^{-5}$ ; Kennemann et al. 2011) and  
417 on genomes from 40 family members ( $1.38 \times 10^{-5}$ ; Didelot et al 2013) are compatible with that inferred  
418 here by a purely divergent model. The bacterial recombination rate per initiation site per year obtained  
419 from our genomes analyzed with ClonalFrame ( $9.09 \times 10^{-9}$ ) is more than 20 times slower than a  
420 previous estimate of  $2.4 \times 10^{-7}$  reported in Morelli et al. (2010), based on housekeeping genes using the  
421 same approach. It is important to note, however, that the recombination rate was not included in our  
422 models and that our absolute estimates are in generations instead of years.

423 Growth rates ( $r$ , see Table 2A) were negative for African clusters indicating population size  
424 reductions, with current effective population sizes ( $N_c$ ) being several times lower than ancestral  
425 population sizes ( $N_a$ ) for Africa2 and Africa1, respectively (Table 2A). The other three populations  
426 show signatures of expansion and appear to have been founded by a comparable few individuals,  
427 subsequently undergoing rapid growth. Migration rates are similarly small among pairwise populations,  
428 however outgoing migration rates from Africa are lower than the others (Table 2B). This result may  
429 indicate that gene flow did not extensively involve geographic macroareas, but if it did occur, mixed  
430 stains are more likely to be found in specific contact regions (e.g., coastal areas). Confidence intervals  
431 of demographic estimates with migration obtained using parametric bootstrap are reported in Table 2  
432 and show important uncertainty associated with the best estimates.

433

#### 434 *Tests of positive selection and identified candidate regions*

435 After correction of likelihood values with demographic simulations, the SweeD test of selection  
436 did not identify any strongly selected loci at the global level (Figure 3), but did indicate differential  
437 signatures of positive selection at the population level (Figure 3; Table 3). The largest number of  
438 selected loci was detected among African bacterial strains associated with San-speaking people

439 (Africa2). Signatures of local positive selection were also observed in the Africa1 and American  
440 populations (Figure 3), while remaining populations (Eurasian and East Asian) did not show strong  
441 evidence for recent local adaptation (Figure 3).

442 The same dataset analyzed with OmegaPlus, using as a null distribution the same demographic  
443 simulations analysed with SweeD, gave different results, with significance found mainly in the  
444 worldwide sample (Figure 3). The highest values of linkage disequilibrium were found in the global  
445 dataset (Table S3), with the highest peak associated with a gene coding for the elongation protein  
446 NusA, which has been studied in *Escherichia coli* (Cohen et al. 2010). Despite the structured nature of  
447 the worldwide sample, previous studies have demonstrated that population structure has little to no  
448 impact on the specific LD structure captured by the Omega statistic (e.g., Jensen et al. 2007a).

449 Both methods, SweeD and OmegaPlus, indicate several signatures of positive selection in  
450 African and American populations, while much lower signals are observed for Euro-Asian populations.  
451 The synthesis of the two analyses is presented in Figure 3. Regions that were significant for only one of  
452 the two methods were considered if their likelihood or omega value overcame the maximum value  
453 found for overlapping regions.

454 Using this approach, 158 genes are identified as putatively positively selected in either the total  
455 worldwide datasets or in the 5 sub-populations (Table S3 and S4), with the highest number (51) found  
456 in the Africa2 population. Moreover, this includes several unknown genes, most of which appear to  
457 code for outer membrane proteins (Table S4). Copper-associated genes (2 *copA* and 1 *copP*) are also  
458 indicated as positively selected. These genes are part of the *sro* bacterial operon and may relieve copper  
459 toxicity (Table S3; Beier et al. 1997; Festa and Thiele 2012). Among Africa2 strains, the highest  
460 likelihood values among Africa2 strains correspond to a well-known division protein gene (*ftsA*)  
461 (Figure 3 and Table S4). Moreover, the *pyrB* gene coding for aspartate carbamoyltransferase is also  
462 identified and was previously suggested as essential for bacterial survival (Burns et al. 2000). In the  
463 Africa1 population, the most important signal of selection appears associated to a *vacA* gene, a trait

464 which has been consistently studied given its role in *H. pylori* pathogenic process (*e.g.* Basso et al.  
465 2008; Yamaoka 2010). Other *vacA* and *vacA*-like genes are indicated in Africa2 and EuroAsian  
466 populations (Table S3 and S4).

## 467 **Discussion**

468           Our analysis of a global *H. pylori* genome sample sought to illuminate both the selective and  
469 demographic histories of this human pathogen. Our analyses of population structure were carried out  
470 with particular attention, as population genetic clusters were the basic unit for demographic and  
471 selection inferences. Previous work based on MLST sequences and STRUCTURE software found a  
472 higher number of clusters distributed worldwide, a result largely accepted in the field. However, given  
473 the importance of population structure and the theoretical and computational limitations of some  
474 approaches, as well as the clonal reproductive behaviour of our organism, we explored population  
475 structure from complementary points of view (*i.e.* multivariate analysis, Bayesian analysis, co-ancestry  
476 analysis and coalescent genealogy). This combination of multiple approaches identified fewer  
477 populations globally, and thus offers an alternative perspective to previous results. Furthermore, our  
478 inferred mutation rate represents the first attempt to study the long-term substitution rate of *H. pylori*  
479 on a worldwide genome sample. Under a purely divergent model, the result was similar to the long-  
480 term rate previously estimated from MLST housekeeping genes (Morelli et al. 2010), but introducing  
481 migration led to much higher estimates.

482           While this analysis based on high-resolution data provides a reliable relative estimate of times  
483 to population divergence events, the open question remains on how to interpret and compare the  
484 bacterial inferences with those based on human genetics. Times of population splits T1, T2 and T4 are,  
485 in terms of the number of generations, roughly twice as old as has been proposed in the human  
486 demographic literature. If we use these estimates as calibration points to translate number of  
487 generations into years, we can deduce a number of bacterial generations per year = 2. An exception is  
488 represented by the estimate of San bacterial divergence when migration is accounted for, as the number  
489 of generations doubles to ~530k translating into ~265kya of split (still assuming a bacterial number of  
490 2 generations per year). Notably, one recent estimate of San divergence obtained by Excoffier et al.  
491 (2013) is very near our estimate, *i.e.* ~260kya. If we alternatively used the latter estimate of split of

492 Africa2 strains from others as a calibration point to deduce the number of bacterial generations per  
493 year, then we would consider that ~530k bacterial generations happened within ~110kya (which is the  
494 most supported estimate of San split from human genetic data). In this case, the number of generations  
495 per year would be ~4.8 and the other times to bacterial population splits (T2, T3 and T4) would  
496 translate into much more recent events, although the relative timing of colonization of different  
497 geographic regions in absolute number of generations would not be affected.

498 *H. pylori* generation time is thus a key parameter in the estimation of co-evolutionary times of  
499 host-parasite population differentiation and also to make a comparison between our inferred long-term  
500 mutation rate with previous estimates which are calibrated in years instead of generations. Although  
501 two generations per year may seem unreasonably slow for a bacterial organism, we cannot exclude that  
502 the peculiar epidemiological dynamics of this bacterium, such as lifelong infection and acquisition  
503 early in life (see Introduction), may influence the long term generation time here considered. Both  
504 experimental (*i.e.* familial studies of age structured host samples) and analytical epidemiological  
505 models could be used to obtain an empirical estimate. Since *H. pylori* strains could not have colonized  
506 any area before the arrival of their human host, our proposed generational time can be considered a  
507 lower limit.

508 Apart from methodological limitations, the events and their timings elucidated here are largely  
509 congruent with the human genetic and archaeological literature, confirming previous hypotheses of a  
510 close co-evolutionary relationship between the two species (Linz et al. 2007; Moodley et al. 2012). The  
511 divergence of the African strains associated with the San, assuming a good fit between human and  
512 bacterial estimates, supports an ancient origin of human *Helicobacter* - seeming to have been already in  
513 association with the human host before the separation of the San population, and older than an  
514 association of at least ~100 kyr suggested by MLST sequences (Moodley et al. 2012). Given the high  
515 level of host-specialization, one may hypothesize that this stomach pathogen evolved along with the  
516 human host early in the genus *Homo* – a model of interest for future investigation.

517 Most interestingly, from the bacterial perspective, are the strong signals of population size  
518 reduction within Africa, particularly dramatic in the case of the San-associated Africa2. This could have  
519 resulted from a reduction in the effective size of the human host population itself, as we know that San  
520 hunter-gatherer populations were adversely affected by the Bantu expansion (over 1000 years ago) and  
521 by more recent European colonization. However, this does not explain a similar but not as strongly  
522 negative growth rate in Africa1 strains, associated with the Bantu and other African populations, which  
523 are known to have increased in population effective size since the Neolithic revolution. One alternative  
524 to human demography may be stronger selection in Africa, a notion that is consistent with the larger  
525 number of putatively adaptive regions identified in Africa, relative to other sampled populations  
526 (Figure 3 and Table S3). Despite the very high prevalence of *H. pylori* on this continent, a significant  
527 association with the incidence of gastric diseases has never been demonstrated (Bauer and Meyer 2011;  
528 Graham et al. 2007). The opposite is true in non-African strains, where we show that *H. pylori* had a  
529 very low ancestral effective population size, coupled with the high population growth rates in our  
530 global sample. It may, therefore, be reasonable to hypothesize that the long-term African association of  
531 this bacterium with human populations may have led to selection for reduced pathogenicity, whereas a  
532 founder effect and rapid growth during the colonization of populations in other areas of the world could  
533 have freed this population from these long term selective constraints, possibly resulting in a more  
534 virulent and pathogenic bacterial population (Argent et al. 2008; Duncan et al. 2013). Concerning the  
535 divergence of the American population, we did not detect a clear signature of a founder event. Although  
536 the timing of the population split fits with the estimated human colonization of the Americas, we  
537 acknowledge an important lack of sampling coverage of the vast Siberia region which hinders more  
538 conclusive results on the expansion dynamics of *H. pylori* across East Asia and to the Americas.

539 The results obtained with different selection methods address somewhat different biological  
540 questions and the extent to which each of these is robust to non-equilibrium demographic histories has  
541 only been partially described (*e.g.*, Crisci et al. 2013). Based on our inferred demographic history,



542 however, it is possible to describe the true and false positive rates of these statistics for our specific  
543 model of interest – representing an empirical solution that may partially overcome such limitations.  
544 Global signatures of selection were found in association with several genes of unknown function.

545

#### 546 *Worldwide and population-specific genes under selection*

547       Patterns of local adaptation are potentially of great medical interest, as they may help explain  
548 the continentally-differing patterns of virulence observed thus far (Wroblewski et al. 2010; Bauer and  
549 Meyer 2011; Matsunari et al. 2012; Shiota et al. 2013). TheAfrica2 population shows the strongest  
550 evidence of recurrent local adaptation, a result which is perhaps intuitive given its long association with  
551 the San, one of the most ancient of human groups. Adaptive events within Africa2 include the protein  
552 coding *ftsA* gene (Table S3), which is associated with the cytoskeletal assembly during bacterial cell  
553 division (Loose and Mitchison 2014). In addition, results from the analysis of the Africa1 population  
554 highlight potentially interesting aspects of the long-term adaptation of *H. pylori* to this population.  
555 Among European strains, we identified the only instance in which an antibiotic-associated gene (the  
556 penicillin binding protein 1A, *mrcA*; Table S3) was under selection. This gene was experimentally  
557 shown to confer resistance to  $\beta$ -Lactam when a single amino acid substitution occurs (Ser414→Arg;  
558 Gerrits et al. 2002). Although our annotated genome of the EuroAsian strains does not show this  
559 specific alteration, European *H. pylori* has been more likely exposed to antibiotic treatments than in  
560 other regions of the world. On the other hand, recent positive selection at the global level as a  
561 consequence of the use of antibiotics seems unlikely, as antibiotic treatment has not been implemented  
562 on a global scale. Surprisingly, our analysis did not detect relevant signatures of selection among  
563 EastAsian strains, despite the well-known medical risk of gastric cancer associated with these strains.  
564 The American population showed the strongest signature of selection associated with a GTP binding  
565 protein whose role is still unknown (*typA*; Table S3). Our overall results concerning putatively  
566 positively selected genes support the role of important metabolic pathways associated with structural

567 and motility functions. This study thus highlights important candidates for future experimental and  
568 functional selection studies (for a complete list of candidate genes see Table S4).

569

570 *Genes involved in DNA repair.* Worldwide genomic regions under selection were identified by  
571 OmegaPlus (Table S3), with the strongest signature of selection at the transcription elongation factor  
572 gene *nusA*, also flagged locally among EuroAsian strains. In *Escherichia coli*, this protein plays an  
573 important role in DNA repair and damage tolerance (Cohen et al. 2010). Since *H. pylori* infection of  
574 human stomachs can compromise host-cell integrity, inducing breaks in the double-strand and a  
575 subsequent DNA damage response (Toller et al. 2011), an efficient DNA repair mechanism could be  
576 important in protecting bacterial DNA from damage induced by itself or in response to altered  
577 physiological conditions in the host stomach. Along with this, indications of positive selection for  
578 genes protecting DNA integrity were found among Africa2 and American strains: HU binding protein  
579 (*hup*) and during starvation protein (*dps*), respectively (Table 3). The former protein protects DNA  
580 from stress damage in *H. pylori* (Wang et al. 2012), while the latter is required for survival during acid  
581 stress, although its role has been characterized in *E. coli* but not in *H. pylori* (Jeong et al. 2008).

582

583 *Genes involved in methylation patterns.* Several genes expressing proteins involved in DNA  
584 methylation were identified as likely under selection (Table 3). A recent study by Furuta et al. (2014)  
585 used a genomic approach to compare methylation profiles of closely related *H. pylori* strains and  
586 showed outstanding diversity of methylation sequence-specificity across lineages. As methylation is an  
587 epigenetic mechanism responsible for the regulation of gene expression and phenotypic plasticity, the  
588 identification of certain selected methylation genes encourage the study of their specific role and their  
589 evolutionary implications in *H. pylori* methylation patterns.

590

591 *ABC transporters.* The ATP binding cassette (ABC) transporters are ubiquitous, and among their  
592 functions is the ability to expel cytotoxic molecules out of the cell, conferring resistance to drugs

593 (Linton 2007). Two of these uncharacterised genes were indicated to be under positive selection in  
594 American strains (*ykpA* and *yecS*; Table 3).

595

596 *Genes involved into flagellar cascade.* Cell motility and cell adherence to the stomach mucosa is a key  
597 factors for the successful colonization of the human stomach, and several positively selected flagellum-  
598 specific genes (*flgL*, *flhB*, *fliI* and *fliY*) were identified across different local populations (Table 3).

599 Apart from genes involved into the flagellar cascade, positive selection was also detected in the  
600 regulating factor of the cascade itself ( $\sigma^{54}$  or *rpoN*), corroborating the importance of bacterial  
601 motility in survival (Table 3).

602

603 *Genes involved in heavy metal metabolism.* Importantly, our selection analysis highlights a potentially  
604 predominant role for genes associated with copper metabolism in the *H. pylori* life cycle, with the same  
605 genes flagged in multiple populations (Table 3). Copper mediated colonization of the stomach mucosa  
606 occurs through the action of trefoil peptides in *H. pylori* (Montefusco et al. 2013) and copper  
607 drastically increases in cancerous tissues. However the detailed role of *copA* and *copP* genes and of  
608 copper metabolism in *H. pylori* long-term adaptation is yet to be investigated. Interestingly, the Africa1  
609 population shows signatures of positive selection of two genes involved in the transport and regulation  
610 of nickel (*nixA*, *yhhG*), while EuroAsian strains show hints of selection for a cadmium, zinc and cobalt  
611 transporters (*cadA*; see Table 3).

612

613 *Genes involved in virulence.* We identified a number of putatively selected *vacA* genes in local  
614 populations as expected from previous indications of their importance in *H. pylori* pathogenicity  
615 (Olbermann et al 2010). It is further interesting to note that *vacA* and *vacA-like* genes also show  
616 evidence for selection among African populations, where the association of *H. pylori* with gastric  
617 disease is not considered to be significant. In particular, Africa1 strains present a strong signal  
618 associated with the acetone carboxylase beta subunit (*acxA*; Table 3), which is part of the

619 pathologically relevant operon *acxABC*, as it is associated with virulence and survival of the bacterium  
620 into the host stomach (Brahmachary et al. 2008; Harvey 2012). These observations suggest that  
621 virulence-related genes may nonetheless play an important role in bacterial adaptation or, more  
622 specifically, that *H. pylori* may indeed have a pathogenic role among African populations that is  
623 masked by other factors leading to gastric diseases. Finally, the Tumor Necrosis Factor Alpha-Inducing  
624 Protein (*Tifa*; Suganuma et al. 2001; 2006; 2008) was identified in EuroAsian and American strains,  
625 calling for closer investigation in relation to its potentially pathogenic role among these specific  
626 populations.

627  
628 *Outer membrane proteins (OMP)*. Many unknown genes appear into the list of putatively selected  
629 genes (Table 3). Among those, there could be a particular interest in further investigating the nature and  
630 role of outer membrane proteins, which would certainly provide valuable information on the interaction  
631 of *H. pylori* and the gastric environment. There are at least five recognized families of genes coding for  
632 OMP (HopA-E), which are involved in the processes of adherence to the gastric mucosa and thus play  
633 an important role in successful colonization of the host's stomach (Oleastro and Ménard 2013;  
634 Yamaoka and Alm 2008). Moreover, the importance of specific OMP genes in *H. pylori* has been  
635 investigated in recent studies (Kennemann et al. 2012; Nell et al. 2014).

636  
637 From an evolutionary perspective, our study presents evidence for processes of adaptation in *H.*  
638 *pylori* to its human host, but, regrettably, does not provide a perspective on the co-evolutionary  
639 interactions that are likely to have occurred during their long history of association. In this sense, it is  
640 intriguing to speculate that the interaction with the human host did not simply lead to pathogenic  
641 conditions but also to mutual adaptation. Theories on beneficial interactions of *H. pylori* and the human  
642 host have been already suggested (Blaser 2008). The observation that fewer than 15% of infected  
643 human individuals show clinical symptoms has led previous studies to speculate that *H. pylori* may

644 play an important, but not necessarily pathogenic, role in the human gastric niche, potentially even  
645 protecting its host from other gastric infections (Shahabi et al. 2008; Blaser 2008; Atherton and Blaser  
646 2009). In support of this idea, a recent survey among native Americans reported that patients with  
647 lower host-bacteria co-ancestry - that is, patients infected with hpEurope (here included into the  
648 Eurasian population) and not with hspAmerind (the American population) - show increased severity of  
649 premalignant lesions in gastric cancer (Kodaman et al. 2014). Hopefully, future investigation will also  
650 focus on the long-term interaction of the two species and the possible signatures in the human genome  
651 that result from the long association with *H. pylori*.

652         Although our results highlighting major selective events in Africa are supported by a common  
653 African origin for both species, the co-evolutionary history between *H. pylori* and humans is an area  
654 that warrants future and more detailed investigation at the genomic level. A first step would be the  
655 inclusion of more genomes from underrepresented regions such as Sahul, North-East Africa, Central  
656 Asia and the Americas. Furthermore, unrepresented regions such as Siberia and Oceania would allow  
657 for the investigation of genetic continuity/discontinuity across north-eastern and south-eastern Asia to  
658 the Americas and the Pacific, respectively. A deeper analysis of Asian, American and Austronesian  
659 bacterial genomes may also help shed light on alternative Pacific routes for the colonization of the  
660 Americas, a hypothesis that has been widely debated in the literature (see Gonçalves et al. 2013;  
661 Malaspinas et al., 2014).

662 **Acknowledgements**

663           This project was supported by ERA-NET PathoGenoMics project HELDIVNET (0313930B)  
664 from the German Ministry of Education and Research (BMBF) to SS and BMBFproject 01GS0805 to  
665 RR for massive parallel sequencing. VM was supported by a postdoctoral fellowship from the  
666 European Union (Framework 7) and a short term post-doctoral fellowship from the European  
667 Molecular Biology Organization (EMBO). JDJ and MF were supported by grants from the Swiss  
668 National Science Foundation and a European Research Council (ERC) Starting Grant to JDJ. XD  
669 would like to acknowledge the NIHR for Health Protection Research Unit funding. We would like to  
670 thank the Vital-IT bioinformatic center for the technical support with the Vital-IT cluster. We also thank  
671 Mark Achtman for useful comments on an early version of the manuscript.

672 **Disclosure declaration**

673 Authors declare no conflict of interest.

## 674 **References**

- 675 Alachiotis N, Stamatakis A, Pavlidis P. 2012. OmegaPlus: a scalable tool for rapid detection of  
676 selective sweeps in whole-genome datasets. *Bioinformatics* **28**: 2274–2275.
- 677 Allaker RP, Young KA, Hardie JM, Domizio P, Meadows NJ. 2002. Prevalence of helicobacter pylori at  
678 oral and gastrointestinal sites in children: evidence for possible oral-to-oral transmission. *J Med*  
679 *Microbiol* **51**: 312–317.
- 680 Argent RH, Hale JL, El-Omar EM, Atherton JC. 2008. Differences in Helicobacter pylori CagA  
681 tyrosine phosphorylation motif patterns between western and East Asian strains, and influences on  
682 interleukin-8 secretion. *J Med Microbiol* **57**: 1062–1067.
- 683 Atherton JC, Blaser MJ. 2009. Coadaptation of Helicobacter pylori and humans: ancient history,  
684 modern implications. *J Clin Invest* **119**: 2475–2487.
- 685 Basso D, Zambon C-F, Letley DP, Stranges A, Marchet A, Rhead JL, Schiavon S, Guariso G, Ceroti M,  
686 Nitti D, et al. 2008. Clinical relevance of Helicobacter pylori cagA and vacA gene polymorphisms.  
687 *Gastroenterology* **135**: 91–99.
- 688 Bauer B, Meyer TF. 2011. The Human Gastric Pathogen *Helicobacter pylori* and Its Association with  
689 Gastric Cancer and Ulcer Disease. *Ulcers* doi:10.1155/2011/340157.
- 690 Blaser MJ. 2008. Disappearing Microbiota: Helicobacter pylori Protection against Esophageal  
691 Adenocarcinoma. *Cancer Prev Res* **1**: 308–311.
- 692 Breurec S, Guillard B, Hem S, Brisse S, Dieye FB, Huerre M, Oung C, Raymond J, Tan TS, Thiberge  
693 J-M, et al. 2011. Evolutionary history of Helicobacter pylori sequences reflect past human migrations  
694 in Southeast Asia. *PLoS ONE* **6**: e22058.

- 695 Brown LM. 2000. Helicobacter pylori: epidemiology and routes of transmission. *Epidemiol Rev* **22**:  
696 283–297.
- 697 Bures J, Kopáčová M, Koupil I, Voríšek V, Rejchrt S, Beránek M, Seifert B, Pozler O, Zivný P, Douda  
698 T, et al. 2006. Epidemiology of Helicobacter pylori infection in the Czech Republic. *Helicobacter* **11**:  
699 56–65.
- 700 Burns BP, Hazell SL, Mendz GL, Kolesnikow T, Tillet D, Neilan BA. 2000. The Helicobacter pylori  
701 pyrB gene encoding aspartate carbamoyltransferase is essential for bacterial survival. *Arch Biochem*  
702 *Biophys* **380**: 78–84.
- 703 Burnie JP, Matthews RC, Carter T, Beaulieu E, Donohoe M, Chapman C, Williamson P, Hodgetts SJ.  
704 2000. Identification of an Immunodominant ABC Transporter in Methicillin-Resistant Staphylococcus  
705 aureus Infections. *Infect Immun* **68**: 3200–3209.
- 706 Bustamante CD, Wakeley J, Sawyer S, Hartl DL. 2001. Directional selection and the site-frequency  
707 spectrum. *Genetics* **159**: 1779–88.
- 708 Cavalli-Sforza LL, Menozzi P, Piazza A. 1994. *The History and Geography of Human Genes*.  
709 Princeton University Press.
- 710 Chen J, Bu XL, Wang QY, Hu PJ, Chen MH. 2007. Decreasing Seroprevalence of Helicobacter pylori  
711 Infection during 1993–2003 in Guangzhou, Southern China. *Helicobacter* **12**: 164–169.
- 712 Cohen SE, Lewis CA, Mooney RA, Kohanski MA, Collins JJ, Landick R, Walker GC. 2010. Roles for  
713 the transcription elongation factor NusA in both DNA repair and damage tolerance pathways in  
714 Escherichia coli. *Proc Natl Acad Sci USA* **107**: 15517–15522.
- 715 Crisci JL, Poh Y-P, Bean A, Simkin A, Jensen JD. 2012. Recent progress in polymorphism-based  
716 population genetic inference. *J Hered* **103**: 287–296.



- 717 Crisci JL, Poh Y-P, Mahajan S, Jensen JD. 2013. The impact of equilibrium assumptions on tests of  
718 selection. *Front Genet* **4**: 235.
- 719 Csilléry K, François O, Blum MGB. 2012. abc: an R package for approximate Bayesian computation  
720 (ABC). *Methods in Ecology and Evolution* **3**: 475–479.
- 721 Darling ACE, Mau B, Blattner FR, Perna NT. 2004. Mauve: multiple alignment of conserved genomic  
722 sequence with rearrangements. *Genome Res* **14**: 1394–1403.
- 723 Darling AE, Mau B, Perna NT. 2010. progressiveMauve: multiple genome alignment with gene gain,  
724 loss and rearrangement. *PLoS ONE* **5**: e11147.
- 725 Didelot X, Falush D. 2007. Inference of bacterial microevolution using multilocus sequence data.  
726 *Genetics* **175**: 1251–1266.
- 727 Didelot X, Nell S, Yang I, Woltemate S, van der Merwe S, Suerbaum S. 2013. Genomic evolution and  
728 transmission of *Helicobacter pylori* in two South African families. *Proc Natl Acad Sci USA* **110**:  
729 13880–13885.
- 730 Van Domselaar GH, Stothard P, Shrivastava S, Cruz JA, Guo A, Dong X, Lu P, Szafron D, Greiner R,  
731 Wishart DS. 2005. BASys: a web server for automated bacterial genome annotation. *Nucleic Acids Res*  
732 **33**: W455–459.
- 733 Du Q, Wang H, Xie J. 2011. Thiamin (Vitamin B1) Biosynthesis and Regulation: A Rich Source of  
734 Antimicrobial Drug Targets? *Int J Biol Sci* **7**: 41–52.
- 735 Duncan SS, Valk PL, McClain MS, Shaffer CL, Metcalf JA, Bordenstein SR, Cover TL. 2013.  
736 Comparative Genomic Analysis of East Asian and Non-Asian *Helicobacter pylori* Strains Identifies  
737 Rapidly Evolving Genes. *PLoS ONE* **8**: e55120.

- 738 van Duynhoven YT, de Jonge R. 2001. Transmission of *Helicobacter pylori*: a role for food? *Bull*  
739 *World Health Organ* **79**: 455–460.
- 740 Eriksson A, Betti L, Friend AD, Lycett SJ, Singarayer JS, von Cramon-Taubadel N, Valdes PJ, Balloux  
741 F, Manica A. 2012. Late Pleistocene climate change and the global expansion of anatomically modern  
742 humans. *Proc Natl Acad Sci USA* **109**: 16089–16094.
- 743 Excoffier L, Hofer T, Foll M. 2009. Detecting loci under selection in a hierarchically structured  
744 population. *Heredity* **103**: 285–298.
- 745 Excoffier L, Dupanloup I, Huerta-Sánchez E, Sousa VC, Foll M. 2013. Robust demographic inference  
746 from genomic and SNP data. *PLoS Genet* **9**: e1003905.
- 747 Falush D, Kraft C, Taylor NS, Correa P, Fox JG, Achtman M, Suerbaum S. 2001. Recombination and  
748 mutation during long-term gastric colonization by *Helicobacter pylori*: estimates of clock rates,  
749 recombination size, and minimal age. *Proc Natl Acad Sci USA* **98**: 15056–15061.
- 750 Falush D, Wirth T, Linz B, Pritchard JK, Stephens M, Kidd M, Blaser MJ, Graham DY, Vacher S,  
751 Perez-Perez GI, et al. 2003. Traces of human migrations in *Helicobacter pylori* populations. *Science*  
752 **299**: 1582–1585.
- 753 Festa RA, Thiele DJ. 2012. Copper at the Front Line of the Host-Pathogen Battle. *PLoS Pathog* **8**:  
754 e1002887.
- 755 Foll M, Gaggiotti O. 2008. A genome-scan method to identify selected loci appropriate for both  
756 dominant and codominant markers: a Bayesian perspective. *Genetics* **180**: 977–993.
- 757 Furuta Y., Namba-Fukuyo H., Shibata T. F., Nishiyama T., Shigenobu S., Suzuki Y., Sugano S., Hasebe  
758 M., Kobayashi I., 2014 Methylome Diversification through Changes in DNA Methyltransferase  
759 Sequence Specificity. *PLoS Genet* **10**: e1004272.

- 760 Gerrits M. M., Schuijffel D., Zwet A. A. VAN, Kuipers E. J., Vandenbroucke-Grauls C. M. J. E.,  
761 Kusters J. G., 2002 Alterations in Penicillin-Binding Protein 1A Confer Resistance to  $\beta$ -Lactam  
762 Antibiotics in *Helicobacter pylori*. *Antimicrob Agents Chemother* **46**: 2229–2233.
- 763 Ghose C, Perez-Perez GI, van Doorn LJ, Domínguez-Bello MG, Blaser MJ. 2005. High frequency of  
764 gastric colonization with multiple *Helicobacter pylori* strains in Venezuelan subjects. *J Clin Microbiol*  
765 **43**: 2635–2641.
- 766 Gonçalves VF, Stenderup J, Rodrigues-Carvalho C, Silva HP, Gonçalves-Dornelas H, Líryo A, Kivisild  
767 T, Malaspinas A-S, Campos PF, Rasmussen M, et al. 2013. Identification of Polynesian mtDNA  
768 haplogroups in remains of Botocudo Amerindians from Brazil. *Proc Natl Acad Sci USA* **110**: 6465–  
769 6469.
- 770 Graham DY, Yamaoka Y, Malaty HM. 2007. Thoughts about populations with unexpected low  
771 prevalences of *Helicobacter pylori* infection. *Trans R Soc Trop Med Hyg* **101**: 849–851.
- 772 Gressmann H, Linz B, Ghai R, Pleissner KP, Schlapbach R, Yamaoka Y, Kraft C, Suerbaum S, Meyer  
773 TF, Achtman M. 2005. Gain and loss of multiple genes during the evolution of *Helicobacter pylori*.  
774 *PLoS Genet* **1**: e43.
- 775 Hammer MF, Woerner AE, Mendez FL, Watkins JC, Wall JD. 2011. Genetic evidence for archaic  
776 admixture in Africa. *Proc Natl Acad Sci USA* **108**: 15123–15128.
- 777 Jensen JD, Thornton KR, Bustamante CD, Aquadro CF. 2007a. On the Utility of Linkage  
778 Disequilibrium as a Statistic for Identifying Targets of Positive Selection in Nonequilibrium  
779 Populations. *Genetics* **176**: 2371–2379.
- 780 Jensen J. D., Bauer DuMont V. L., Ashmore A. B., Gutierrez A., Aquadro C. F., 2007b Patterns  
781 of sequence variability and divergence at the diminutive gene region of *Drosophila melanogaster*:

- 782 complex patterns suggest an ancestral selective sweep. *Genetics* **177**: 1071–1085.
- 783 Jeong K. C., Hung K. F., Baumler D. J., Byrd J. J., Kaspar C. W., 2008 Acid stress damage of DNA is  
784 prevented by Dps binding in *Escherichia coli* O157:H7. *BMC Microbiol* **8**: 181.
- 785 Jolley KA, Maiden MCJ. 2010. BIGSdb: Scalable analysis of bacterial genome variation at the  
786 population level. *BMC Bioinformatics* **11**: 595.
- 787 Jombart T. 2008. adegenet: a R package for the multivariate analysis of genetic markers.  
788 *Bioinformatics* **24**: 1403–1405.
- 789 Jombart T, Ahmed I. 2011. adegenet 1.3-1: new tools for the analysis of genome-wide SNP data.  
790 *Bioinformatics* **27**: 3070–3071.
- 791 Jombart T, Devillard S, Balloux F. 2010. Discriminant analysis of principal components: a new method  
792 for the analysis of genetically structured populations. *BMC Genet* **11**: 94.
- 793 Jombart T. 2012. A tutorial for Discriminant Analysis of Principal Components (DAPC) using  
794 Adegenet 1.3-4. Available at: <http://cran.r-project.org/web/packages/adegenet/>
- 795 Kalinowski ST. 2011. The computer program STRUCTURE does not reliably identify the main genetic  
796 clusters within species: simulations and implications for human population structure. *Heredity (Edinb)*  
797 **106**: 625–632.
- 798 Kawai M, Furuta Y, Yahara K, Tsuru T, Oshima K, Handa N, Takahashi N, Yoshida M, Azuma T,  
799 Hattori M, et al. 2011. Evolution in an oncogenic bacterial species with extreme genome plasticity:  
800 *Helicobacter pylori* East Asian genomes. *BMC Microbiol* **11**: 104.
- 801 Kennemann L, Didelot X, Aebischer T, Kuhn S, Drescher B, Droege M, Reinhardt R, Correa P, Meyer  
802 TF, Josenhans C, et al. 2011. *Helicobacter pylori* genome evolution during human infection. *Proc Natl*

- 803 *Acad Sci USA* **108**: 5033–5038.
- 804 Kennemann L., Brenneke B., Andres S., Engstrand L., Meyer T. F., Aebischer T., Josenhans  
805 C., Suerbaum S., 2012 In Vivo Sequence Variation in HopZ, a Phase-Variable Outer Membrane  
806 Protein of *Helicobacter pylori*. *Infect. Immun.* **80**: 4364–4373.
- 807 Khalifa MM, Sharaf RR, Aziz RK. 2010. *Helicobacter pylori*: a poor man’s gut pathogen? *Gut Pathog*  
808 **2**: 2.
- 809 Kim Y, Nielsen R. 2004. Linkage disequilibrium as a signature of selective sweeps. *Genetics* **167**:  
810 1513–1524.
- 811 Kodaman N, Pazos A, Schneider BG, Piazuolo MB, Mera R, Sobota RS, Sicinski LA, Shaffer CL,  
812 Romero-Gallo J, Sablet T de, et al. 2014. Human and *Helicobacter pylori* coevolution shapes the risk  
813 of gastric disease. *PNAS* **111**: 1455–1460.
- 814 Lawson DJ, Hellenthal G, Myers S, Falush D. 2012. Inference of Population Structure using Dense  
815 Haplotype Data. *PLoS Genet* **8**: e1002453.
- 816 Lawson D. J., 2013 Populations in statistical genetic modelling and inference. arXiv:1306.0701 [q-bio].
- 817 Linton K. J., 2007 Structure and Function of ABC Transporters. *Physiology* **22**: 122–130.
- 818 Linz B, Balloux F, Moodley Y, Manica A, Liu H, Roumagnac P, Falush D, Stamer C, Prugnolle F, van  
819 der Merwe SW, et al. 2007. An African origin for the intimate association between humans and  
820 *Helicobacter pylori*. *Nature* **445**: 915–918.
- 821 Loose M, Mitchison TJ. 2014. The bacterial cell division proteins FtsA and ftsA self-organize into  
822 dynamic cytoskeletal patterns. *Nat Cell Biol* **16**: 38–46.

- 823 Lotterhos KE, Whitlock MC. 2014. Evaluation of demographic history and neutral parameterization on  
824 the performance of FST outlier tests. *Mol Ecol*. doi: 10.1111/mec.12725. [Epub ahead of print]
- 825 Maynard Smith J, Haigh J. 1974. The hitch-hiking effect of a favourable gene. *Genetics Research* **23**:  
826 23–35.
- 827 Malaspinas A.-S., Lao O., Schroeder H., Rasmussen M., Raghavan M., Moltke I., Campos P. F.,  
828 Sagredo F. S., Rasmussen S., Gonçalves V. F., Albrechtsen A., Allentoft M. E., Johnson P. L. F., Li M.,  
829 Reis S., Bernardo D. V., DeGiorgio M., Duggan A. T., et al, 2014 Two ancient human genomes reveal  
830 Polynesian ancestry among the indigenous Botocudos of Brazil. *Current Biology* **24**: R1035–R1037.
- 831 Marshall BJ, Warren JR. 1984. Unidentified curved bacilli in the stomach of patients with gastritis and  
832 peptic ulceration. *Lancet* **1**: 1311–1315.
- 833 Matsunari O, Shiota S, Suzuki R, Watada M, Kinjo N, Murakami K, Fujioka T, Kinjo F, Yamaoka Y.  
834 2012. Association between *Helicobacter pylori* Virulence Factors and Gastroduodenal Diseases in  
835 Okinawa, Japan. *J Clin Microbiol* **50**: 876–883.
- 836 Mégraud F. 1997. Resistance of *Helicobacter pylori* to antibiotics. *Aliment Pharmacol Ther* **11(Suppl.**  
837 **1)**: 43–53.
- 838 Miller JR, Delcher AL, Koren S, Venter E, Walenz BP, Brownley A, Johnson J, Li K, Mobarry C,  
839 Sutton G. 2008. Aggressive assembly of pyrosequencing reads with mates. *Bioinformatics* **24**: 2818–  
840 2824.
- 841 Moodley Y, Linz B. 2009. *Helicobacter pylori* Sequences Reflect Past Human Migrations. *Genome*  
842 *Dyn* **6**: 62–74.
- 843 Moodley Y, Linz B, Bond RP, Nieuwoudt M, Soodyall H, Schlebusch CM, Bernhöft S, Hale J,  
844 Suerbaum S, Mugisha L, et al. 2012. Age of the association between *Helicobacter pylori* and man.

- 845 *PLoS Pathog* **8**: e1002693.
- 846 Moodley Y, Linz B, Yamaoka Y, Windsor HM, Breurec S, Wu J-Y, Maady A, Bernhöft S, Thiberge J-  
847 M, Phuanukoonnon S, et al. 2009. The peopling of the Pacific from a bacterial perspective. *Science*  
848 **323**: 527–530.
- 849 Montefusco S, Esposito R, D’Andrea L, Monti MC, Dunne C, Dolan B, Tosco A, Marzullo L, Clyne  
850 M. 2013. Copper Promotes TFF1-Mediated *Helicobacter pylori* Colonization. *PLoS ONE* **8**: e79455.
- 851 Morelli G, Didelot X, Kusecek B, Schwarz S, Bahlawane C, Falush D, Suerbaum S, Achtman M. 2010.  
852 Microevolution of *Helicobacter pylori* during prolonged infection of single hosts and within families.  
853 *PLoS Genet* **6**: e1001036.
- 854 Narum SR, Hess JE. 2011. Comparison of F(ST) outlier tests for SNP loci under selection. *Mol Ecol*  
855 *Resour* **11 Suppl 1**: 184–194.
- 856 Nell S, Eibach D, Montano V, Maady A, Nkwescheu A, Siri J, Elamin WF, Falush D, Linz B, Achtman  
857 M, et al. 2013. Recent acquisition of *Helicobacter pylori* by Baka pygmies. *PLoS Genet* **9**: e1003775.
- 858 Nell S., Kennemann L., Schwarz S., Josenhans C., Suerbaum S., 2014 Dynamics of Lewis b Binding  
859 and Sequence Variation of the babA Adhesin Gene during Chronic *Helicobacter pylori* Infection in  
860 Humans. *mBio* **5**: e02281–14.
- 861 Nielsen R, Williamson S, Kim Y, Hubisz MJ, Clark AG, Bustamante C. 2005. Genomic scans for  
862 selective sweeps using SNP data. *Genome Res* **15**: 1566–1575.
- 863 Okada K, Minehira M, Zhu X, Suzuki K, Nakagawa T, Matsuda H, Kawamukai M. 1997. The ispB  
864 gene encoding octaprenyl diphosphate synthase is essential for growth of *Escherichia coli*. *J Bacteriol*  
865 **179**: 3058–3060.

- 866 Oleastro M, Menard A. 2013. The Role of Helicobacter pylori Outer Membrane Proteins in Adherence  
867 and Pathogenesis. *Biology (Basel)* **2**: 1110–1134
- 868 Paradis E. 2010. pegas: an R package for population genetics with an integrated-modular approach.  
869 *Bioinformatics* **26**: 419–420.
- 870 Paradis E, Claude J, Strimmer K. 2004. APE: Analyses of Phylogenetics and Evolution in R language.  
871 *Bioinformatics* **20**: 289–290.
- 872 Patra R, Chattopadhyay S, De R, Ghosh P, Ganguly M, Chowdhury A, Ramamurthy T, Nair GB,  
873 Mukhopadhyay AK. 2012. Multiple infection and microdiversity among Helicobacter pylori isolates in  
874 a single host in India. *PLoS ONE* **7**: e43370.
- 875 Pavlidis P, Živkovic D, Stamatakis A, Alachiotis N. 2013. SweeD: likelihood-based detection of  
876 selective sweeps in thousands of genomes. *Mol Biol Evol* **30**: 2224–2234.
- 877 Perry S, de la Luz Sanchez M, Yang S, Haggerty TD, Hurst P, Perez-Perez G, Parsonnet J. 2006.  
878 Gastroenteritis and transmission of Helicobacter pylori infection in households. *Emerging Infect Dis*  
879 **12**: 1701–1708.
- 880 Salama NR, Hartung ML, Müller A. 2013. Life in the human stomach: persistence strategies of the  
881 bacterial pathogen Helicobacter pylori. *Nat Rev Microbiol* **11**: 385–399.
- 882 Salih BA. 2009. Helicobacter pylori infection in developing countries: the burden for how long? *Saudi*  
883 *J Gastroenterol* **15**: 201–207.
- 884 Shiota S, Suzuki R, Yamaoka Y. 2013. The significance of virulence factors in Helicobacter pylori. *J*  
885 *Dig Dis* **14**: 341–349.
- 886 Schlebusch CM, Skoglund P, Sjödin P, Gattepaille LM, Hernandez D, Jay F, Li S, Jongh MD, Singleton



- 887 A, Blum MGB, et al. 2012. Genomic Variation in Seven Khoe-San Groups Reveals Adaptation and  
888 Complex African History. *Science* **338**: 374–379.
- 889 Schwarz S, Morelli G, Kusecek B, Manica A, Balloux F, Owen RJ, Graham DY, van der Merwe S,  
890 Achtman M, Suerbaum S. 2008. Horizontal versus familial transmission of *Helicobacter pylori*. *PLoS*  
891 *Pathog* **4**: e1000180.
- 892 Shahabi S, Rasmi Y, Jazani NH, Hassan ZM. 2008. Protective effects of *Helicobacter pylori* against  
893 gastroesophageal reflux disease may be due to a neuroimmunological anti-inflammatory mechanism.  
894 *Immunol Cell Biol* **86**: 175–178.
- 895 Singh V, Somvanshi P. 2009. Homology modelling of 3-oxoacyl-acyl carrier protein synthase II from  
896 *Mycobacterium tuberculosis* H37Rv and molecular docking for exploration of drugs. *J Mol Model* **15**:  
897 453–460.
- 898 Suerbaum S, Michetti P. 2002. *Helicobacter pylori* infection. *N Engl J Med* **347**: 1175–1186.
- 899 Suganuma M, Kurusu M, Okabe S, Sueoka N, Yoshida M, Wakatsuki Y, Fujiki H. 2001. *Helicobacter*  
900 *Pylori* Membrane Protein 1: A New Carcinogenic Factor of *Helicobacter Pylori*. *Cancer Res* **61**: 6356–  
901 6359.
- 902 Suganuma M, Kuzuhara T, Yamaguchi K, Fujiki H. 2006. Carcinogenic role of tumor necrosis factor-  
903 alpha inducing protein of *Helicobacter pylori* in human stomach. *J Biochem Mol Biol* **39**: 1–8.
- 904 Suganuma M, Yamaguchi K, Ono Y, Matsumoto H, Hayashi T, Ogawa T, Imai K, Kuzuhara T,  
905 Nishizono A, Fujiki H. 2008. TNF-alpha-inducing protein, a carcinogenic factor secreted from *H.*  
906 *pylori*, enters gastric cancer cells. *Int J Cancer* **123**: 117–122.
- 907 Sycuro LK, Wyckoff TJ, Biboy J, Born P, Pincus Z, Vollmer W, Salama NR. 2012. Multiple  
908 peptidoglycan modification networks modulate *Helicobacter pylori*'s cell shape, motility, and

- 909 colonization potential. *PLoS Pathog* **8**: e1002603.
- 910 Tang C-L, Hao B, Zhang G-X, Shi R-H, Cheng W-F. 2013. Helicobacter pylori tumor necrosis factor- $\alpha$   
911 inducing protein promotes cytokine expression via nuclear factor- $\kappa$ B. *World J Gastroenterol* **19**: 399–  
912 403.
- 913 Tang J, Hanage WP, Fraser C, Corander J. 2009. Identifying currents in the gene pool for bacterial  
914 populations using an integrative approach. *PLoS Comput Biol* **5**: e1000455.
- 915 Thornton KR, Jensen JD. 2007. Controlling the false-positive rate in multilocus genome scans for  
916 selection. *Genetics* **175**: 737–750.
- 917 Toller IM, Neelsen KJ, Steger M, Hartung ML, Hottiger MO, Stucki M, Kalali B, Gerhard M, Sartori  
918 AA, Lopes M, et al. 2011. Carcinogenic bacterial pathogen Helicobacter pylori triggers DNA double-  
919 strand breaks and a DNA damage response in its host cells. *Proc Natl Acad Sci USA* **108**: 14944–  
920 14949.
- 921 Veeramah KR, Wegmann D, Woerner A, Mendez FL, Watkins JC, Destro-Bisol G, Soodyall H, Louie  
922 L, Hammer MF. 2011. An Early Divergence of KhoeSan Ancestors from Those of Other Modern  
923 Humans Is Supported by an ABC-Based Analysis of Autosomal Resequencing Data. *Mol Biol Evol*  
924 msr212.
- 925 Wright GD, Walsh CT. 1992. D-Alanyl-D-alanine ligases and the molecular mechanism of vancomycin  
926 resistance. *Acc Chem Res* **25**: 468–473.
- 927 Wright GD, Walsh CT. 1993. Identification of a common protease-sensitive region in D-alanyl-D-  
928 alanine and D-alanyl-D-lactate ligases and photoaffinity labeling with 8-azido ATP. *Protein Sci* **2**:  
929 1765–1769.
- 930 Wroblewski LE, Peek RM, Wilson KT. 2010. Helicobacter pylori and Gastric Cancer: Factors That

- 931 Modulate Disease Risk. *Clin Microbiol Rev* **23**: 713–739.
- 932 Yamaoka Y. 2010. Mechanisms of disease: Helicobacter pylori virulence factors. *Nat Rev*
- 933 *Gastroenterol Hepatol* **7**: 629–641.
- 934 Yamaoka Y. 2008. *Helicobacter Pylori: Molecular Genetics and Cellular Biology*. Horizon Scientific
- 935 Press.
- 936 Wang G., LO L. F., Maier R. J., 2012 A histone-like protein of Helicobacter pylori protects DNA from
- 937 stress damage and aids host colonization. *DNA Repair (Amst)* **11**: 733–740.

938 **Table 1.** Population summary statistics based on a globally representative data set of 60 *Helicobacter*  
939 *pylori* genomes.  $N$  is the number of strains per population;  $n$  is the mean number of pairwise  
940 differences. P-values refer to Tajima's  $D$ .

| Pop      | N  | Number of segregating Loci |           |           | $n$      | Tajima's D | p-value |
|----------|----|----------------------------|-----------|-----------|----------|------------|---------|
|          |    | 2 alleles                  | 3 alleles | 4 alleles |          |            |         |
| Africa2  | 11 | 117125                     | 4276      | 171       | 40472.9  | -0.40437   | 0.747   |
| Africa1  | 12 | 139958                     | 7034      | 345       | 50885.2  | -0.03660   | 0.995   |
| EurAsia  | 16 | 197093                     | 16713     | 1325      | 63187.7  | -0.52261   | 0.649   |
| EastAsia | 12 | 127160                     | 5508      | 275       | 40246.74 | -0.79713   | 0.476   |
| America  | 9  | 101895                     | 3777      | 183       | 30781.8  | -0.47308   | 0.706   |

**Table 2.A)** Most likely demographic parameters estimated with *fastsimcoal2.1* for tree topology 2 and relative confidence intervals calculated for the migration model, which is the most supported. Parameters are reported assuming 2 generations/year. Population parameters correspond to those depicted in Figure 3;  $r$  parameters are the population growth rates, with the numeric order indicating populations from Africa2 to America (see Figure 3);  $\mu$  is the mutation rate.

| Parameters   |            | Ancestral effective populations size (Na) |           |          |         |         | Current effective population size (Nc) |         |           |           |         |
|--------------|------------|-------------------------------------------|-----------|----------|---------|---------|----------------------------------------|---------|-----------|-----------|---------|
|              |            | Na0                                       | Na1       | Na2      | Na3     | Na4     | Nc0                                    | Nc1     | Nc2       | Nc3       | Nc4     |
| No migration | Three pops | 1,918,265                                 | 309,326   | 171,636  | -       | -       | 106,580                                | 898,799 | 3,178,763 | -         | -       |
| “            | Four pops  | 1,852,974                                 | 809,566   | 477,655  | 51,188  | -       | 101,030                                | 230,367 | 2,307,144 | 1,875,418 | -       |
| “            | Five pops  | 2,373,071                                 | 1,083,279 | 293,795  | 28,444  | 18,449  | 103,453                                | 257,756 | 2,015,267 | 761,583   | 690,042 |
| Migration    | “          | 1,215,564                                 | 223,068   | 10,366   | 11,580  | 11,821  | 102,164                                | 106,142 | 813,228   | 399,904   | 184,468 |
| c.i. 0.05    |            | 240,056                                   | 12,066.4  | 22,252.0 | 12,017  | 11,990  | 105,459                                | 103,772 | 230,774   | 108,383   | 128,091 |
| c.i. 0.95    |            | 2,056,863                                 | 395,493   | 452,400  | 357,243 | 383,897 | 1,154,059                              | 841,312 | 1,375,820 | 817,227   | 789,851 |

| Population splitting times |         |        |        | Population growth rates |            |            |            |            | Mutation rate |
|----------------------------|---------|--------|--------|-------------------------|------------|------------|------------|------------|---------------|
| T1                         | T2      | T3     | T4     | r0                      | r1         | r2         | r3         | r4         | $\mu$         |
| 273,339                    | 138,190 | -      | -      | 1.057e-05               | -3.902e-06 | -2.112e-05 | -          | -          | 8.069e-06     |
| 229,697                    | 119,441 | 75,369 | -      | 1.267e-05               | 5.472e-06  | -1.318e-05 | -4.778e-05 | -          | 4.596e-06     |
| 245,942                    | 128,714 | 45,670 | 31,778 | 1.274e-05               | 5.837e-06  | -1.496e-05 | -7.198e-05 | -0.000113  | 1.479e-07     |
| 529,626                    | 89,686  | 69,096 | 44,338 | 4.675e-06               | 1.402e-06  | -4.864e-05 | -5.126e-05 | -6.196e-05 | 0.0009732     |
| 102,889                    | 53,942  | 34,197 | 11,430 | -6.223e-06              | -9.437e-06 | -3.978e-06 | -7.891e-05 | -1.693e-04 | 0.0002284     |
| 350,810                    | 95,913  | 51,312 | 28,388 | 1.434e-05               | 5.251e-06  | -3.558e-05 | 7.689e-06  | 1.172e-05  | 0.0008439     |

**Table 2.B)** All  $M$  are pairwise migration rates numbered from population 0 (Africa2) to population 4 (America).

| <b>M01</b> | <b>M10</b> | <b>M12</b> | <b>M21</b> | <b>M23</b> | <b>M32</b> | <b>M34</b> | <b>M43</b> | <b>M02</b> | <b>M20</b> |
|------------|------------|------------|------------|------------|------------|------------|------------|------------|------------|
| 2.1092e-07 | 2.3405e-06 | 6.8818e-07 | 1.0032e-05 | 3.7624e-06 | 2.0730e-06 | 3.9028e-06 | 4.6873e-06 | 1.0517e-06 | 1.6399e-06 |
| 4.0924e-07 | 1.3297e-07 | 9.7725e-07 | 1.0824e-06 | 5.4905e-07 | 1.6803e-06 | 1.5580e-06 | 1.3040e-06 | 2.6228e-07 | 1.9271e-07 |
| 7.7355e-06 | 1.2793e-05 | 8.4155e-06 | 1.1639e-05 | 9.4577e-06 | 9.0864e-06 | 8.1415e-06 | 8.7104e-06 | 7.0558e-06 | 1.1664e-05 |
| <b>M03</b> | <b>M30</b> | <b>M04</b> | <b>M40</b> | <b>M13</b> | <b>M31</b> | <b>M14</b> | <b>M41</b> | <b>M24</b> | <b>M42</b> |
| 1.4843e-07 | 1.1139e-06 | 1.3739e-06 | 2.9639e-07 | 3.4169e-07 | 1.4061e-07 | 2.6611e-07 | 3.3381e-07 | 3.7917e-06 | 2.7227e-06 |
| 8.7827e-07 | 1.6083e-07 | 4.3319e-07 | 1.2945e-06 | 4.1117e-07 | 1.0548e-06 | 7.6409e-07 | 1.7891e-06 | 1.3625e-06 | 5.1306e-07 |
| 8.5424e-06 | 1.3895e-05 | 8.1077e-06 | 8.6616e-06 | 8.5431e-06 | 7.7131e-06 | 8.0440e-06 | 8.6578e-06 | 8.6370e-06 | 8.8781e-06 |

**Table 3.** List of genes identified as being under positive selection by population, classified by function. Populations are abbreviated as Wd = worldwide; Af2 = Africa2; Af1 = Africa1; EuAs = EuroAsia; Eas = EastAsia; Am = America. For a complete list of genes identified as being putatively positively selected in worldwide and local samples see Table S3.

| <b>Functional group</b>           |                 |                                                              | <b>Population</b> |     |     |      |      |    |   |
|-----------------------------------|-----------------|--------------------------------------------------------------|-------------------|-----|-----|------|------|----|---|
|                                   |                 |                                                              | Wd                | Af2 | Af1 | EuAs | EaAs | Am |   |
| <b><i>DNA repair</i></b>          |                 |                                                              |                   |     |     |      |      |    |   |
| nusA                              | 1200135-1201322 | Transcription elongation protein nusA                        | *                 |     |     | *    |      |    |   |
| hup                               | 436148-435789   | DNA-binding protein HU                                       |                   | *   |     |      |      |    |   |
| dps                               | 204062-203625   | DNA protection during starvation protein                     |                   |     |     |      |      |    | * |
| <b><i>Methylases</i></b>          |                 |                                                              |                   |     |     |      |      |    |   |
| vspIM                             | 394565-397009   | Modification methylase VspI                                  | *                 |     |     |      |      |    |   |
| bsp6IM                            | 400156-400575   | Modification methylase Bsp6I                                 | *                 |     | *   |      |      |    | * |
| rimO                              | 525847-527163   | Ribosomal protein S12 methylthiotransferase RimO             |                   |     |     | *    |      |    |   |
| rsmH                              | 544664-543756   | Ribosomal RNA small subunit methyltransferase H              | *                 |     |     |      | *    |    |   |
| mboIBM                            | 67666-68421     | Modification methylase MboIB                                 |                   |     |     | *    | *    |    |   |
| torZ                              | 830889-830026   | Trimethylamine-N-oxide reductase                             |                   |     | *   |      |      |    | * |
| ngoBIM                            | 901339-900317   | Modification methylase NgoBI                                 |                   | *   |     |      |      |    |   |
| trmD                              | 920231-919542   | tRNA guanine-N1--methyltransferase                           |                   |     |     | *    |      |    |   |
| rlmN                              | 1125936-1124869 | Ribosomal RNA large subunit methyltransferase N              |                   |     | *   |      |      |    |   |
| <b><i>ABC transportes</i></b>     |                 |                                                              |                   |     |     |      |      |    |   |
| ykpA                              | 426574-428175   | Uncharacterized ABC transporter ATP-binding protein YkpA     |                   |     |     |      |      |    | * |
| yecS                              | 779424-778525   | Probable amino-acid ABC transporter permease protein HI_0179 |                   |     |     |      |      |    | * |
| <b><i>Metal related genes</i></b> |                 |                                                              |                   |     |     |      |      |    |   |

|                                       |                 |                                              |   |   |   |   |   |   |
|---------------------------------------|-----------------|----------------------------------------------|---|---|---|---|---|---|
| copA                                  | 321905-319935   | Copper-transporting ATPase                   | * | * | * | * |   |   |
| copP                                  | 319934-319734   | Cop-associated protein                       |   |   |   |   | * |   |
| copA                                  | 1188908-1186560 | Copper-exporting P-type ATPase A             |   |   | * | * |   |   |
| nixA                                  | 316216-317211   | High-affinity nickel-transport protein nixA  |   |   | * |   |   |   |
| yhhG                                  | 1086396-1085875 | Putative nickel-responsive regulator         |   |   | * |   |   |   |
| cadA                                  | 471626-473686   | Cadmium zinc and cobalt-transporting ATPase  |   |   |   |   | * |   |
| <b><i>Falgellar Cascade genes</i></b> |                 |                                              |   |   |   |   |   |   |
| fliY                                  | 668666-669037   | Flagellar motor switch phosphatase FliY      | * |   |   |   |   |   |
| fliI                                  | 1120192-1118888 | Flagellum-specific ATP synthase              |   | * |   |   |   |   |
| flhB                                  | 496895-495987   | Flagellar biosynthetic protein flhB          |   |   | * |   |   |   |
| flgL                                  | 257020-254537   | Flagellar hook-associated protein 3          |   |   |   |   |   | * |
| rpoN                                  | 540290-541495   | RNA polymerase sigma-54 factor               | * |   |   |   | * |   |
| <b><i>Unknowns</i></b>                |                 |                                              |   |   |   |   |   |   |
| Unknown                               | 401880-403466   | Outer Membrane Protein                       |   | * |   |   |   |   |
| Unknown                               | 545671-544850   | Outer Membrane Protein                       |   | * |   |   |   |   |
| Unknown                               | 560264-559263   | Outer Membrane Protein                       |   |   | * |   |   |   |
| Unknown                               | 951951-950851   | Outer Membrane Protein                       |   |   |   | * |   |   |
| Unknown                               | 1138544-1140799 | Outer membrane protein                       |   |   | * |   |   |   |
| Unknown                               | 1185912-1184782 | Outer Membrane Protein                       |   |   |   | * | * | * |
| <b><i>Pathogenic genes</i></b>        |                 |                                              |   |   |   |   |   |   |
| Tipa                                  | 656788-656210   | Tumor Necrosis Factor Alpha-Inducing Protein |   |   |   | * |   | * |
| vacA                                  | 247650-249185   | Vacuolating cytotoxin autotransporter        |   |   |   | * |   |   |
| vacA                                  | 731291-732442   | Vacuolating cytotoxin autotransporter        |   |   | * | * |   |   |
| Unknown                               | 764984-765604   | Cytotoxin-Protein like vacA                  | * |   |   |   |   |   |
| acxA                                  | 559085-556944   | Acetone carboxylase beta subunit             |   |   | * |   |   |   |



53

941 **Figure 1.** A) Plots of individual assignments to clusters according to BAPS and DAPC analysis, using  
942  $K = 3$  (A1) clusters with black = Africa2, blue = AfricaEu, red = EuroAsia; and  $K = 4$  (A2) clusters  
943 with black = Africa2, blue = Africa1, red = EuroAsia and orange = AsiaAmerica; B). Scatterplots of the  
944 discriminant space (components 1 and 2) , using  $K = 4$  (B1),  $K = 5$  (B2); C). World map with squares  
945 representing individuals colored according to cluster assignments with yellow squares indicating  
946 American sub-cluster (as for  $K = 5$  in DAPC analysis; see STable 1).

54

49

55

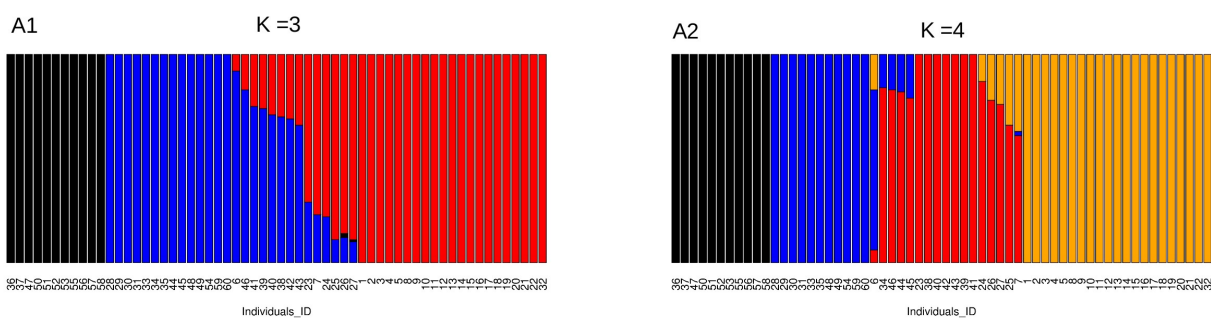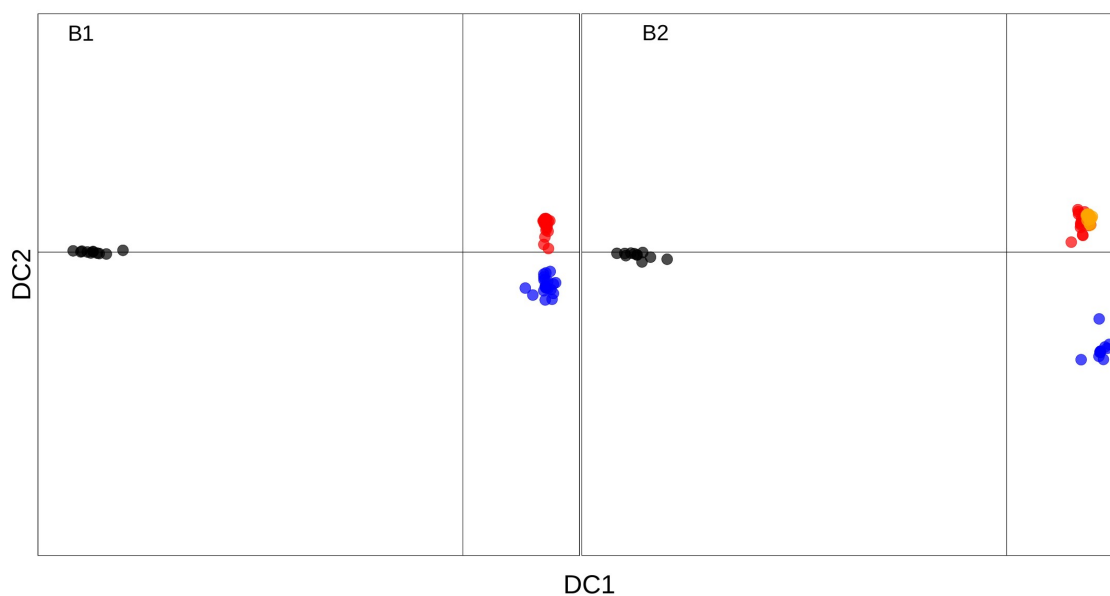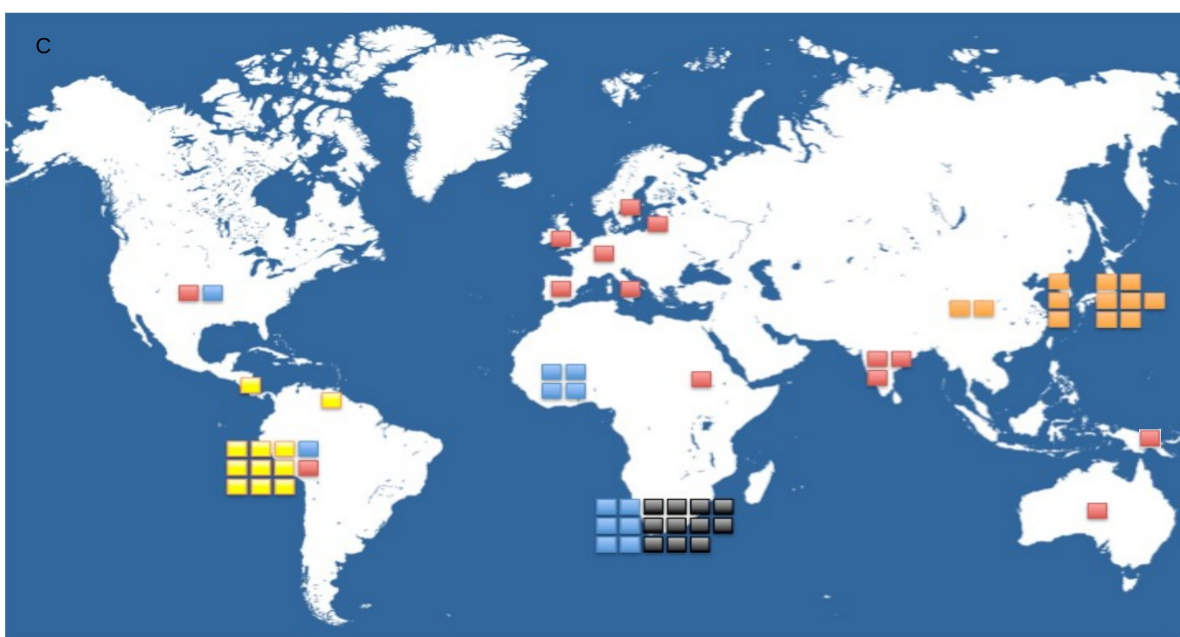

56

50

57

948 **Figure 2.** Schematic representation of the most likely genealogy inferred for *H. pylori* world-wide  
949 sample. Demographic parameters estimated via coalescent simulations are summarized.  $T$  parameters  
950 correspond to time of population splits (1 to 4, most ancient to most recent).  $N_a$  and  $N_c$  parameters  
951 indicate effective ancestral and current population sizes, with 0 being the Africa2 population and 5 the  
952 America population (most ancient to most recent).  $R$  parameters refer to population growth.

953

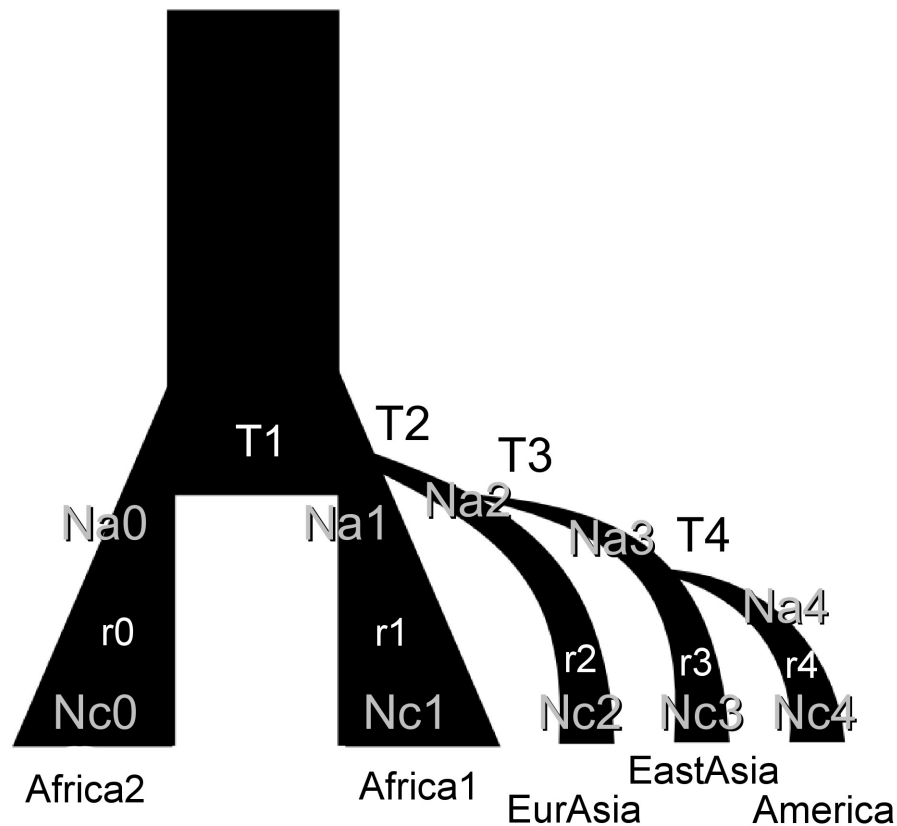

58

51

59

954 **Figure 3.** Results of the SweeD and OmegaPlus analyses. A comparative representation for a  
 955 “synthetic” strain of the worldwide sample and one “synthetic” strain of each population is drawn using  
 956 a fictitious topology. Selection values are reported on the graph above each synthetic strain, on the y-  
 957 axis, and genomic position on the x-axis. Omega values are represented with red lines, while alpha  
 958 values are reported in blue. Since alpha values reach much higher levels than omega values, to make  
 959 the figure easy to read, we reported both omega and alpha values within a scale from zero to 50, and we  
 960 indicated alpha values higher than 50 in darker blue. Genes falling into the functional categories  
 961 explained in the discussion are color-coded as reported in the legend, while remaining are in black.

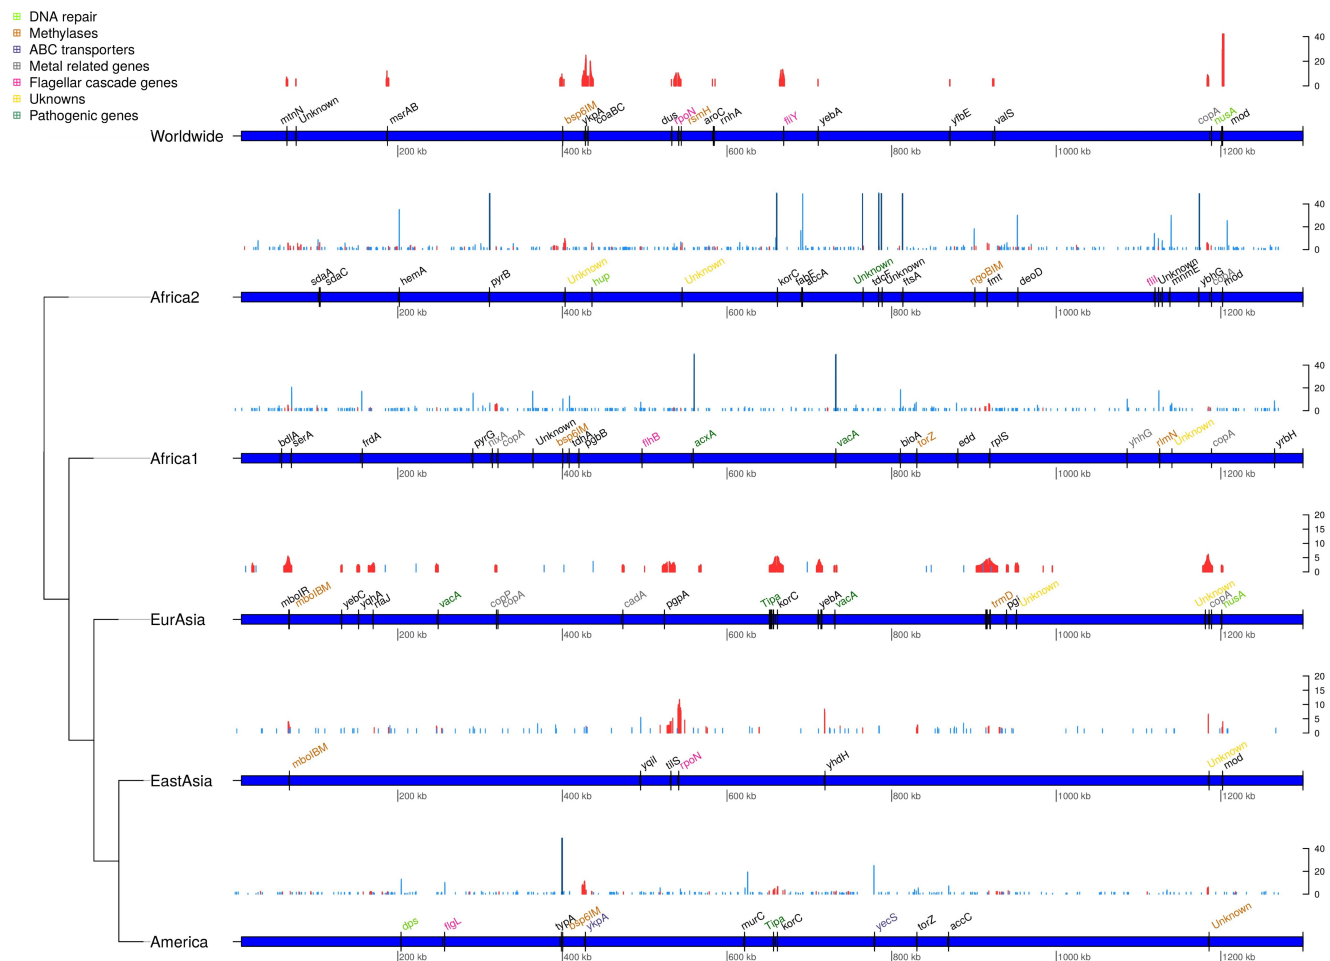

60

52
